# Supplementary material for: Photochemical intramolecular amination for the synthesis of heterocycles
Source: Royal Society of Chemistry journal article supplement (doi:10.1039/c7gc02261a), 2017-01-01

# Photochemical Intramolecular Amination for the Synthesis of Heterocycles.

Shawn Parisien-Collette, Corentin Cruché, Xavier Abel-Snape and Shawn K. Collins\*

Département de Chimie, Centre for Green Chemistry and Catalysis, Université de Montréal, CP 6128  
Station Downtown, Montréal, Québec, Canada H3C 3J7

## SUPPORTING INFORMATION

### TABLE OF CONTENTS:

|                                            |            |
|--------------------------------------------|------------|
| <b>GENERAL</b>                             | <b>S2</b>  |
| <b>SYNTHESIS OF PRECURSORS</b>             | <b>S3</b>  |
| <b>SYNTHESIS OF CARBAZOLES</b>             | <b>S18</b> |
| <b>SYNTHESIS OF CARPROFEN METHYL ESTER</b> | <b>S27</b> |
| <b>KINETIC ISOTOPE EFFECTS</b>             | <b>S31</b> |
| <b>BACKGROUND ON LIGHT SOURCES</b>         | <b>S34</b> |
| <b>ABSORPTION/EMISSION DATA</b>            | <b>S36</b> |
| <b>NMR DATA FOR ALL NEW COMPOUNDS</b>      | <b>S37</b> |

## General:

All reactions that were carried out under anhydrous conditions were performed under an inert argon or nitrogen atmosphere in glassware that had previously been dried overnight at 120 °C or had been flame dried and cooled under a stream of argon or nitrogen.<sup>1</sup> All chemical products were obtained from Sigma-Aldrich Chemical Company or Alfa Aesar and were reagent quality. The following products were prepared according to their respective literature procedures: Methyl (2Z,4E)-2-azido-5-phenylpenta-2,4-dienoate. Technical solvents were obtained from VWR International Co. Anhydrous solvents (CH<sub>2</sub>Cl<sub>2</sub>, Et<sub>2</sub>O, THF, DMF, toluene, and *n*-hexane) were dried and deoxygenated using a GlassContour system (Irvine, CA). Isolated yields reflect the mass obtained following flash column silica gel chromatography. Organic compounds were purified using the method reported by W. C. Still<sup>2</sup> and using silica gel obtained from Silicycle Chemical division (40-63 nm; 230-240 mesh). Analytical thin-layer chromatography (TLC) was performed on glass-backed silica gel 60 coated with a fluorescence indicator (Silicycle Chemical division, 0.25 mm, F<sub>254</sub>). Visualization of TLC plate was performed by UV (254 nm), KMnO<sub>4</sub> or *p*-anisaldehyde stains. All mixed solvent eluents are reported as v/v solutions. Concentration refers to removal of volatiles at low pressure on a rotary evaporator. All reported compounds were homogeneous by thin layer chromatography (TLC) and by <sup>1</sup>H NMR. NMR spectra were taken in deuterated CDCl<sub>3</sub> using Bruker AV-300 and AV-400 instruments unless otherwise noted. Signals due to the solvent served as the internal standard (CHCl<sub>3</sub>: δ 7.27 for <sup>1</sup>H, δ 77.0 for <sup>13</sup>C). The acquisition parameters are shown on all spectra. The <sup>1</sup>H NMR chemical shifts and coupling constants were determined assuming first-order behavior. Multiplicity is indicated by one or more of the following: s (singlet), d (doublet), t (triplet), q (quartet), m (multiplet), br (broad); the list of couplings constants (*J*) corresponds to the order of the multiplicity assignment. High resolution mass spectroscopy (HRMS) was done by the Centre régional de spectrométrie de masse at the Département de Chimie, Université de Montréal from an Agilent LC-MSD TOF system using ESI mode of ionization unless otherwise noted.

---

<sup>1</sup> Shriver, D. F.; Drezdon, M. A. in *The Manipulation of Air-Sensitive Compounds*; Wiley-VCH: New York, 1986.

<sup>2</sup> Still, W. C.; Kahn, M.; Mitra, A. *J. Org. Chem.* **1978**, *43*, 2923.

## SYNTHESIS OF PRECURSORS

**General Procedure for Suzuki Cross-Coupling (C):** An oven-dried sealed tube was charged with 2-iodoaniline (1 equiv.), arylboronic acid (1.2 equiv.),  $K_2CO_3$  (4 equiv.),  $Pd(PPh_3)_2Cl_2$  (2 mol %) and a mixture of dimethoxyethane/water (1:1 [0.25 M]) under a nitrogen atmosphere. The mixture was stirred at 80 °C for 18 h under nitrogen. Upon cooling, the biphasic solution was diluted with ethyl acetate (20 mL) and the phases were separated. The aqueous phase was extracted twice with EtOAc (20 mL) and the combined organic phases were washed with brine (50 mL). The organic phases were dried over  $Na_2SO_4$ , filtered and concentrated. The crude mixture was purified by silica gel column chromatography (hexanes/ethyl acetate) to afford corresponding product.

**General Procedure for Sandmeyer reaction (D):** The corresponding 2-aminobiaryl (1.0 equiv.) was dissolved in a mixture of acetic acid / water (2:1, 0.1 M) and cooled to 0 °C.  $NaNO_2$  (1.4 equiv.) was added and the resulting was stirred at 0 °C for one hour.  $NaN_3$  (1.5 equiv.) was then added slowly, the resulting mixture was warmed to room temperature and stirred for an additional hour. The solution was diluted with  $CH_2Cl_2$  (20 mL) and made basic by the slow addition of saturated aqueous  $K_2CO_3$  until bubbling ceased. The phases were separated and the aqueous phase was extracted twice with  $CH_2Cl_2$  (20 mL). The combined organic phases were washed with water (50 mL) and brine (50 mL). The organic phases were dried over  $Na_2SO_4$ , filtered and concentrated. The crude mixture was purified by silica gel column chromatography (hexanes/ethyl acetate) to afford corresponding product.

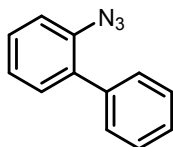

**2-Azido-1,1'-biphenyl (1):** Following the General Procedure D, starting from [1,1'-biphenyl]-2-amine (1.0 g, 5.9 mmol), the crude mixture was purified by silica gel column chromatography (100 % hexanes → 10 % ethyl acetate in hexanes), to afford the desired product as a yellow solid (1.08 g, 94 % yield). NMR data was in accordance with what was previously reported.<sup>3</sup>

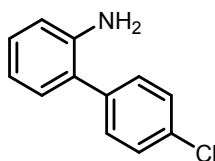

**4'-Chloro-[1,1'-biphenyl]-2-amine (S1):** Following the General Procedure C, starting from 4-chlorophenylboronic acid (0.28 g, 1.8 mmol, 1.2 equiv.), the crude mixture was purified by silica gel column chromatography (100 % hexanes → 10 % ethyl acetate in hexanes), to afford the desired product as a brown oil (0.25 g, 81 % yield). NMR data was in accordance with what was previously reported.<sup>4</sup>

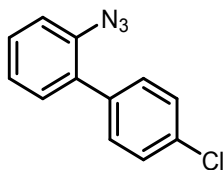

**2-Azido-4'-chloro-1,1'-biphenyl (2):** Following the General Procedure D, starting from 4'-chloro-[1,1'-biphenyl]-2-amine **S1** (0.25 g, 1.2 mmol), the crude mixture was purified by silica gel column chromatography (100 % hexanes → 10 % ethyl acetate in hexanes), to afford the desired product as a yellow solid (0.20 g, 74 % yield). NMR data was in accordance with what was previously reported.<sup>5</sup>

<sup>3</sup>Stokes, B. J.; Jovanović, B.; Dong, H.; Richert, K. J.; Riell, R. D.; Driver, T. G. *J. Org. Chem.* **2009**, *74*, 3225-3228

<sup>4</sup>Liang, Z.; Feng, R.; Yin, H.; Zhang, Y. *Org. Lett.* **2013**, *15*, 4544-4547

<sup>5</sup> Nagaki, A.; Ichinari, D.; Yoshida, J. *J. Am. Chem. Soc.* **2014**, *136*, 12245-12248

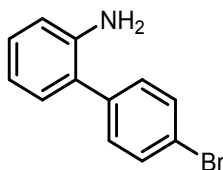

**4'-Bromo-[1,1'-biphenyl]-2-amine (S2):** Following the General Procedure C, starting from 4-bromophenylboronic acid (0.36 g, 1.8 mmol, 1.2 equiv.), the crude mixture was purified by silica gel column chromatography (100 % hexanes → 10 % ethyl acetate in hexanes), to afford the desired product as a yellow solid (0.25 g, 68 % yield). NMR data was in accordance with what was previously reported.<sup>6</sup>

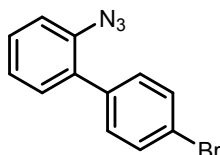

**2-Azido-4'-bromo-1,1'-biphenyl (3):** Following the General Procedure D, starting from 4'-bromo-[1,1'-biphenyl]-2-amine **S2** (0.25 g, 1.0 mmol), the crude mixture was purified by silica gel column chromatography (100 % hexanes → 10 % ethyl acetate in hexanes), to afford the desired product as a yellow solid (0.23 g, 84 % yield). <sup>1</sup>H NMR (300 MHz, CDCl<sub>3</sub>) δ = 7.55 (d, *J* = 8.5 Hz, 2H), 7.44-7.38 (m, 1H), 7.34-7.29 (m, 3H), 7.26-7.18 (m, 2H); <sup>13</sup>C NMR (100 MHz, CDCl<sub>3</sub>) δ = 137.1, 137.0, 132.4, 131.3, 131.0, 129.1, 125.0, 121.8, 118.8; HRMS (ESI) *m/z* calculated for C<sub>12</sub>H<sub>7</sub>BrN [M-N<sub>2</sub>-H]<sup>+</sup> 243.9751; found 243.9762.

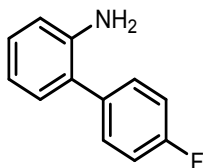

**4'-Fluoro-[1,1'-biphenyl]-2-amine (S3):** Following the General Procedure C, starting from 4-fluorophenylboronic acid (0.17 g, 1.2 mmol, 1.2 equiv.), the crude mixture was purified by silica gel column chromatography (100 % hexanes → 10 % ethyl acetate in hexanes), to afford the desired product as a brown solid (0.15 g, 83 % yield). NMR data was in accordance with what was previously reported.<sup>3</sup>

<sup>6</sup> Ohwada, A.; Nara, S.; Sakamoto, T.; Kikugawa, Y. *J. Chem. Soc., Perkin Trans. I*, **2001**, 3064-3068

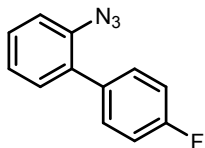

**2-Azido-4'-fluoro-1,1'-biphenyl (S4):** Following the General Procedure D, starting from 4'-fluoro-[1,1'-biphenyl]-2-amine **S3** (0.15 g, 0.8 mmol), the crude mixture was purified by silica gel column chromatography (100 % hexanes → 10 % ethyl acetate in hexanes), to afford the desired product as a white solid (0.15 g, 87 % yield). NMR data was in accordance with what was previously reported.<sup>3</sup>

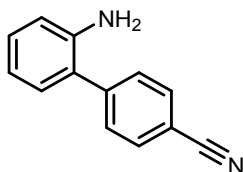

**2'-Amino-[1,1'-biphenyl]-4-carbonitrile (S5):** Following the General Procedure C, starting from 4-cyanophenylboronic acid (0.18 g, 1.2 mmol, 1.2 equiv.), the crude mixture was purified by silica gel column chromatography (100 % hexanes → 30 % ethyl acetate in hexanes), to afford the desired product as a yellow solid (0.18 g, 92 % yield). NMR data was in accordance with what was previously reported.<sup>3</sup>

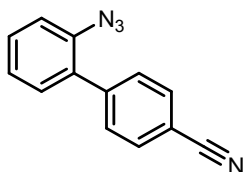

**2'-Azido-[1,1'-biphenyl]-4-carbonitrile (S6):** Following the General Procedure D, starting from 2'-amino-[1,1'-biphenyl]-4-carbonitrile **S5** (0.18 g, 0.9 mmol), the crude mixture was purified by silica gel column chromatography (100 % hexanes → 10 % ethyl acetate in hexanes), to afford the desired product as a yellow solid (0.08 g, 41 % yield). NMR data was in accordance with what was previously reported.<sup>3</sup>

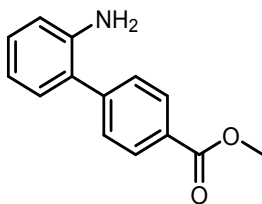

**Methyl 2'-amino-[1,1'-biphenyl]-4-carboxylate (S7):** Following the General Procedure C, starting from 4-methoxycarbonylphenylboronic acid (0.43 g, 2.4 mmol, 1.2 equiv.), the crude mixture was purified by silica gel column chromatography (100 % hexanes → 15 % ethyl acetate in hexanes), to afford the desired product as a pale yellow

solid (0.29 g, 65 % yield).  $^1\text{H}$  NMR (400 MHz,  $\text{CDCl}_3$ )  $\delta$  = 8.12 (d,  $J$  = 8.2 Hz, 2H), 7.56 (d,  $J$  = 8.4 Hz, 2H) 7.20 (ddd,  $J$  = 7.5, 7.5, 1.7 Hz, 1H), 7.14 (dd,  $J$  = 7.5, 1.3 Hz, 1H), 6.85 (ddd,  $J$  = 7.5, 7.5, 1.1 Hz, 1H), 6.79 (dd,  $J$  = 7.9, 0.9 Hz, 1H), 3.96 (s, 3H), 3.76 (brs, 2H);  $^{13}\text{C}$  NMR (100 MHz,  $\text{CDCl}_3$ )  $\delta$  = 166.7, 144.3, 143.3, 130.2, 129.9, 129.0, 128.9, 128.7, 126.1, 118.6, 115.7, 51.9; HRMS (ESI)  $m/z$  calculated for  $\text{C}_{14}\text{H}_{13}\text{NO}_2\text{H}$   $[\text{M}+\text{H}]^+$  228.1015; found 228.1019.

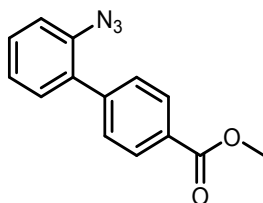

**Methyl 2'-azido-[1,1'-biphenyl]-4-carboxylate (S8):** Following the General Procedure D, starting from methyl 2'-amino-[1,1'-biphenyl]-4-carboxylate **S7** (0.29 g, 1.3 mmol), the crude mixture was purified by silica gel column chromatography (100 % hexanes  $\rightarrow$  10 % ethyl acetate in hexanes), to afford the desired product as a yellow solid (0.29 g, 88 % yield).  $^1\text{H}$  NMR (300 MHz,  $\text{CDCl}_3$ )  $\delta$  = 8.11 (d,  $J$  = 8.6 Hz, 2H), 7.54 (d,  $J$  = 8.6 Hz, 2H), 7.47-7.41 (m, 1H), 7.36 (dd,  $J$  = 7.6, 1.7 Hz, 1H), 7.30-7.21 (m, 2H), 3.95 (s, 3H);  $^{13}\text{C}$  NMR (75 MHz,  $\text{CDCl}_3$ )  $\delta$  = 166.9, 142.8, 137.2, 132.6, 131.1, 129.5, 129.4, 129.3, 129.1; 125.0, 118.8, 52.1; HRMS (ESI)  $m/z$  calculated for  $\text{C}_{14}\text{H}_{11}\text{N}_3\text{O}_2\text{H}$   $[\text{M}+\text{H}]^+$  254.0921; found 254.0924.

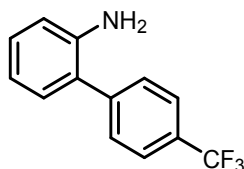

**4'-(Trifluoromethyl)-[1,1'-biphenyl]-2-amine (S9):** Following the General Procedure C, starting from 4-(trifluoromethyl)phenylboronic acid (0.23 g, 1.2 mmol, 1.2 equiv.), the crude mixture was purified by silica gel column chromatography (100 % hexanes  $\rightarrow$  10 % ethyl acetate in hexanes), to afford the desired product as a tan oil (0.20 g, 83 % yield). NMR data was in accordance with what was previously reported.<sup>3</sup>

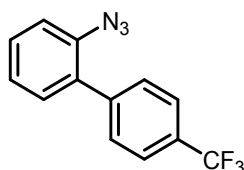

**2-Azido-4'-trifluoromethyl-1,1'-biphenyl (S10):** Following the General Procedure D, starting from 4'-(trifluoromethyl)-[1,1'-biphenyl]-2-amine **S9** (0.20 g, 0.8 mmol), the crude mixture was purified by silica gel column chromatography (100 % hexanes  $\rightarrow$  10

% ethyl acetate in hexanes), to afford the desired product as a clear oil (0.16 g, 78 % yield). NMR data was in accordance with what was previously reported.<sup>3</sup>

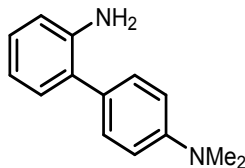

***N',N'*-Dimethyl-[1,1'-biphenyl]-2,4'-diamine (S11):** Following the General Procedure C, starting from 4-(dimethylamino)phenylboronic acid (0.20 g, 1.2 mmol, 1.2 equiv.), the crude mixture was purified by silica gel column chromatography (100 % hexanes → 10 % ethyl acetate in hexanes), to afford the desired product as a red oil (0.19 g, 88 % yield). <sup>1</sup>H NMR (400 MHz, CDCl<sub>3</sub>) δ = 7.36 (d, *J* = 8.6 Hz, 1H), 7.15-7.10 (m, 2H), 6.84-6.76 (m, 4H), 3.79 (brs, 2H), 3.01 (s, 6H); <sup>13</sup>C NMR (100 MHz, CDCl<sub>3</sub>) δ = 149.5, 143.7, 130.3, 129.6, 127.7, 127.6, 127.2, 118.4, 115.3, 112.6, 40.4; HRMS (ESI) *m/z* calculated for C<sub>14</sub>H<sub>16</sub>N<sub>2</sub>H [M+H]<sup>+</sup> 213.1377; found 213.1386.

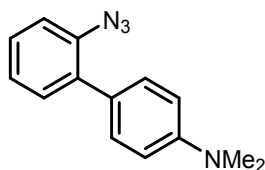

**2'-Azido-*N,N*-dimethyl-[1,1'-biphenyl]-4-amine (S12):** Following the General Procedure D, starting from *N',N'*-dimethyl-[1,1'-biphenyl]-2,4'-diamine **S11** (0.19 g, 0.9 mmol), the crude mixture was purified by silica gel column chromatography (100 % hexanes → 10 % ethyl acetate in hexanes), to afford the desired product as a yellow solid (0.19 g, 90 % yield). <sup>1</sup>H NMR (400 MHz, CDCl<sub>3</sub>) δ = 7.38-7.32 (m, 4H), 7.25-7.17 (m, 2H), 6.80 (d, *J* = 8.7 Hz, 2H), 3.01 (s, 6H); <sup>13</sup>C NMR (100 MHz, CDCl<sub>3</sub>) δ = 149.8, 136.8, 133.9, 190.9, 130.1, 127.6, 125.8, 124.8, 118.6, 111.9, 40.4; HRMS (ESI) *m/z* calculated for C<sub>14</sub>H<sub>14</sub>N<sub>4</sub>H [M+H]<sup>+</sup> 239.1296; found 239.1291.

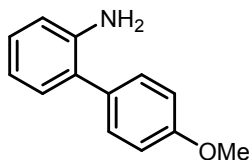

**4'-Methoxy-[1,1'-biphenyl]-2-amine (S13):** Following the General Procedure C, starting from 4-methoxyphenylboronic acid (0.18g, 1.2 mmol, 1.2 equiv.), the crude mixture was purified by silica gel column chromatography (100 % hexanes → 10 % ethyl acetate in hexanes), to afford the desired product as a pale yellow oil (0.19 g, 97 % yield). NMR data was in accordance with what was previously reported.<sup>3</sup>



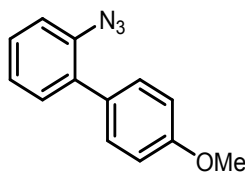

**2-Azido-4'-methoxy-1,1'-biphenyl (S14):** Following the General Procedure D, starting from 4'-methoxy-[1,1'-biphenyl]-2-amine **S13** (0.19 g, 0.97 mmol), the crude mixture was purified by silica gel column chromatography (100 % hexanes → 10 % ethyl acetate in hexanes), to afford the desired product as a yellow solid (0.19 g, 89 % yield). NMR data was in accordance with what was previously reported.<sup>3</sup>

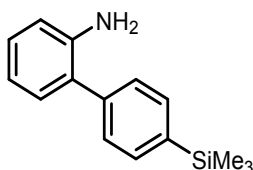

**4'-(Trimethylsilyl)-[1,1'-biphenyl]-2-amine (S15):** Following the General Procedure C, starting from (4-(trimethylsilyl)phenyl)boronic acid (0.35 g, 1.8 mmol, 1.2 equiv.), the crude mixture was purified by silica gel column chromatography (100 % hexanes → 5 % ethyl acetate in hexanes), to afford the desired product as a yellow oil (0.31 g, 86 % yield). <sup>1</sup>H NMR (400 MHz, CDCl<sub>3</sub>) δ = 7.61 (d, *J* = 8.2 Hz, 2H), 7.46 (d, *J* = 8.2 Hz, 2H), 7.19-7.14 (m, 2 H), 6.83 (ddd, *J* = 7.4, 7.4, 1.2 Hz, 1H), 6.78 (dd, *J* = 8.0, 0.8 Hz, 1 H), 3.78 (brs, 2H), 0.32 (s, 9H); <sup>13</sup>C NMR (100 MHz, CDCl<sub>3</sub>) δ = 143.5, 139.9, 139.2, 133.8, 130.4, 128.5, 128.3, 127.6, 118.6, 115.6, -1.1; HRMS (ESI) *m/z* calculated for C<sub>15</sub>H<sub>19</sub>NSiH [M+H]<sup>+</sup> 242.1356; found 242.1359.

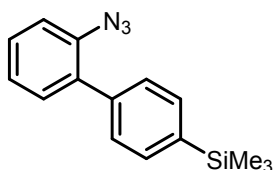

**(2'-Azido-[1,1'-biphenyl]-4-yl)trimethylsilane (S16):** Following the General Procedure D, starting from 4'-(trimethylsilyl)-[1,1'-biphenyl]-2-amine **S15** (0.31 g, 1.3 mmol), the crude mixture was purified by silica gel column chromatography (100 % hexanes → 5 % ethyl acetate in hexanes), to afford the desired product as a pale yellow solid (0.26 g, 74 % yield). <sup>1</sup>H NMR (400 MHz, CDCl<sub>3</sub>) δ = 7.61 (d, *J* = 8.0 Hz, 2H), 7.46 (d, *J* = 8.0 Hz, 2H), 7.43-7.39 (m, 1H), 7.36 (dd, *J*<sub>1</sub> = 7.6 Hz, *J*<sub>2</sub> = 1.5 Hz, 1H), 7.29-7.27 (m, 1H), 7.25-7.21 (m, 1H), 0.32 (s, 9H); <sup>13</sup>C NMR (100 MHz, CDCl<sub>3</sub>) δ = 139.5, 138.5, 137.1, 133.6, 133.1, 131.2, 128.7, 128.6, 124.9, 118.6, -1.1; HRMS (ESI) *m/z* calculated for C<sub>15</sub>H<sub>17</sub>N<sub>3</sub>SiNH<sub>4</sub> [M+NH<sub>4</sub>]<sup>+</sup> 285.1522; found 285.1530.

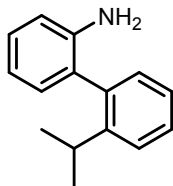

**2'-Isopropyl-[1,1'-biphenyl]-2-amine (S17):** Following the General Procedure C, starting from 1-bromo-2-isopropylbenzene (0.17 mL, 1.1 mmol, 1.1 equiv.) and 2-aminophenylboronic acid hydrochloride (0.17 g, 1.0 mmol, 1.0 equiv.), the crude mixture was purified by silica gel column chromatography (100 % hexanes → 10 % ethyl acetate in hexanes), to afford the desired product as a tan oil (0.22 g, 99 % yield). NMR data was in accordance with what was previously reported.<sup>7</sup>

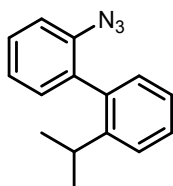

**2-Azido-2'-isopropyl-1,1'-biphenyl (S18):** Following the General Procedure D, starting from 2'-isopropyl-[1,1'-biphenyl]-2-amine **S17** (0.22 g, 1.0 mmol), the crude mixture was purified by silica gel column chromatography (100 % hexanes → 10 % ethyl acetate in hexanes), to afford the desired product as a pale brown solid (0.15 g, 68 % yield). NMR data was in accordance with what was previously reported.<sup>7</sup>

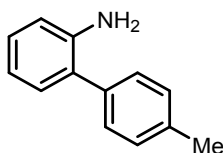

**4'-Methyl-[1,1'-biphenyl]-2-amine (S19):** Following the General Procedure C, starting from 4-methylphenylboronic acid (0.16 g, 1.2 mmol, 1.2 equiv.), the crude mixture was purified by silica gel column chromatography (100 % hexanes → 10 % ethyl acetate in hexanes), to afford the desired product as a clear oil (0.15 g, 83 % yield). NMR data was in accordance with what was previously reported.<sup>3</sup>

<sup>7</sup> Intrieri, D.; Mariani, M.; Caselli, A.; Ragaini, F.; Gallo, E. *Chem. Eur. J.* **2012**, *18*, 10487-10490

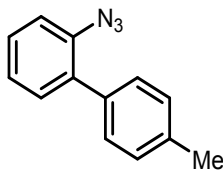

**2-Azido-4'-methyl-1,1'-biphenyl (S20):** Following the General Procedure D, starting from 4'-methyl-[1,1'-biphenyl]-2-amine **S19** (0.15 g, 0.8 mmol), the crude mixture was purified by silica gel column chromatography (100 % hexanes → 10 % ethyl acetate in hexanes), to afford the desired product as a clear oil (0.13 g, 79 % yield). NMR data was in accordance with what was previously reported.<sup>3</sup>

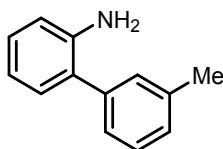

**3'-Methyl-[1,1'-biphenyl]-2-amine (S21):** Following the General Procedure C, starting from 3-methylphenylboronic acid (0.16 g, 1.2 mmol, 1.2 equiv.), the crude mixture was purified by silica gel column chromatography (100 % hexanes → 10 % ethyl acetate in hexanes), to afford the desired product as a tan oil (0.14 g, 76 % yield). NMR data was in accordance with what was previously reported.<sup>3</sup>

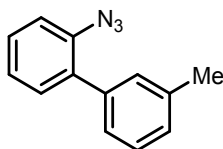

**2-Azido-3'-methyl-1,1'-biphenyl (S22):** Following the General Procedure D, starting from 3'-methyl-[1,1'-biphenyl]-2-amine **S21** (0.14 g, 0.8 mmol), the crude mixture was purified by silica gel column chromatography (100 % hexanes → 10 % ethyl acetate in hexanes), to afford the desired product as a tan oil (0.12 g, 77 % yield). NMR data was in accordance with what was previously reported.<sup>3</sup>

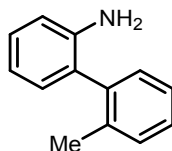

**2'-Methyl-[1,1'-biphenyl]-2-amine (S23):** Following the General Procedure C, starting from 2-methylphenylboronic acid (0.16 g, 1.2 mmol, 1.2 equiv.), the crude mixture was purified by silica gel column chromatography (100 % hexanes → 10 % ethyl acetate in hexanes), to afford the desired product as a tan oil (0.15 g, 84 % yield). NMR data was in accordance with what was previously reported.<sup>3</sup>

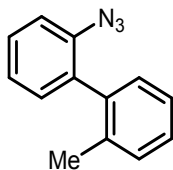

**2-Azido-2'-methyl-1,1'-biphenyl (S24):** Following the General Procedure D, starting from 2'-methyl-[1,1'-biphenyl]-2-amine **S23** (0.15 g, 0.8 mmol), the crude mixture was purified by silica gel column chromatography (100 % hexanes → 10 % ethyl acetate in hexanes), to afford the desired product as a tan oil (0.15 g, 84 % yield). NMR data was in accordance with what was previously reported.<sup>3</sup>

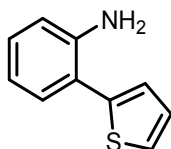

**2-(Thiophen-2-yl)aniline (S25):** Following the General Procedure C, starting from 2-thienylboronic acid (0.31 g, 2.4 mmol, 1.2 equiv.), the crude mixture was purified by silica gel column chromatography (100 % hexanes → 10 % ethyl acetate in hexanes), to afford the desired product as a tan oil (0.30 g, 84 % yield). NMR data was in accordance with what was previously reported.<sup>8</sup>

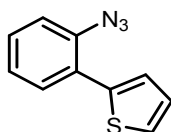

**2-(2-Azidophenyl)thiophene (S26):** Following the General Procedure D, starting from 2-(thiophen-2-yl)aniline **S25** (0.30 g, 1.7 mmol), the crude mixture was purified by silica gel column chromatography (100 % hexanes → 10 % ethyl acetate in hexanes), to afford the desired product as a tan oil (0.30 g, 89 % yield). NMR data was in accordance with what was previously reported.<sup>9</sup>

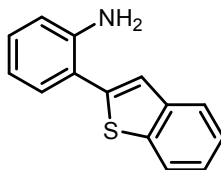

**2-(Benzo[b]thiophen-2-yl)aniline (S27):** Following the General Procedure C, starting from benzo[b]thien-2-ylboronic acid (0.43 g, 2.4 mmol, 1.2 equiv.), the crude mixture was purified by silica gel column chromatography (100 % hexanes → 10 % ethyl acetate

<sup>8</sup> Liang, Z.; Ju, L.; Xie, Y.; Huang, L.; Zhang, Y. *Chem. Eur. J.* **2012**, *18*, 15816-15821

<sup>9</sup> Alt, I. T.; Plietker, B. *Angew. Chem. Int. Ed.* **2016**, *55*, 1519-1522

in hexanes), to afford the desired product as a white solid (0.36 g, 79 % yield). NMR data was in accordance with what was previously reported.<sup>10</sup>

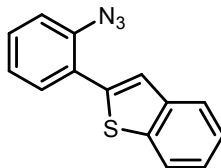

**2-(2-Azidophenyl)benzo[*b*]thiophene (S28):** Following the General Procedure D, starting from 2-(benzo[*b*]thiophen-2-yl)aniline **S27** (0.36 g, 1.6 mmol), the crude mixture was purified by silica gel column chromatography (100 % hexanes → 10 % ethyl acetate in hexanes), to afford the desired product as a pale yellow solid (0.14 g, 35 % yield). <sup>1</sup>H NMR (400 MHz, CDCl<sub>3</sub>) δ = 7.88-7.82 (m, 2H), 7.72 (s, 1H), 7.68 (dd, *J*<sub>1</sub> = 7.7, 1.5 Hz, 1H) 7.43-7.33 (m, 3H), 7.30 (dd, *J* = 8.1, 0.9 Hz, 1H), 7.24-7.20 (m, 1H); <sup>13</sup>C NMR (100 MHz, CDCl<sub>3</sub>) δ = 140.0, 139.9, 139.2, 136.9, 130.7, 129.2, 125.9, 125.0, 124.5, 124.4, 123.8, 123.7, 121.9, 119.1; HRMS (ESI) *m/z* calculated for C<sub>14</sub>H<sub>8</sub>NS [M-N<sub>2</sub>-H]<sup>+</sup> 222.0376; found 222.0378.

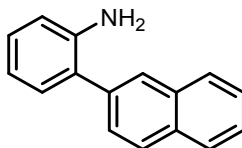

**2-(Naphthalen-2-yl)aniline (S29):** Following the General Procedure C, starting from 2-naphthylboronic acid (0.41 g, 2.4 mmol, 1.2 equiv.), the crude mixture was purified by silica gel column chromatography (100 % hexanes → 10 % ethyl acetate in hexanes), to afford the desired product as a yellow oil (0.36 g, 82 % yield). NMR data was in accordance with what was previously reported.<sup>9</sup>

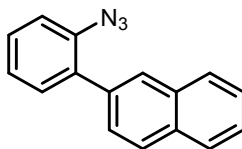

**2-(2-Azidophenyl)naphthalene (S30):** Following the General Procedure D, starting from 2-(naphthalen-2-yl)aniline **S29** (0.36 g, 1.6 mmol), the crude mixture was purified by silica gel column chromatography (100 % hexanes → 10 % ethyl acetate in hexanes), to afford the desired product as a yellow oil (0.34 g, 93 % yield). NMR data was in accordance with what was previously reported.<sup>9</sup>

<sup>10</sup> David, E.; Pellet-Rostaing, S.; Lemaire, M. *Tetrahedron*, **2007**, 63, 8999-9006

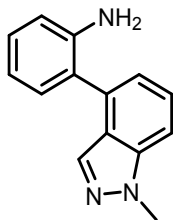

**2-(1-Methyl-1H-indazol-4-yl)aniline (S31):** Following the General Procedure C, starting from 1-methyl-4-(4,4,5,5-tetramethyl-[1,3,2]dioxaborolan-2-yl)-1H-indazole (0.57 g, 2.2 mmol, 1.1 equiv.), the crude mixture was purified by silica gel column chromatography (100 % hexanes  $\rightarrow$  20 % ethyl acetate in hexanes), to afford the desired product as a tan oil (0.39 g, 87 % yield).  $^1\text{H}$  NMR (400 MHz,  $\text{CDCl}_3$ )  $\delta$  = 7.90 (d,  $J$  = 0.7 Hz, 1H), 7.48 (dd,  $J$  = 8.4, 7.0 Hz, 1H), 7.40 (d,  $J$  = 8.4 Hz, 1 H), 7.27-7.19 (m, 3H), 6.90-6.83 (m, 2H), 4.13 (s, 3H), 3.76 (brs, 2H);  $^{13}\text{C}$  NMR (125 MHz,  $\text{CDCl}_3$ )  $\delta$  = 143.8, 140.2, 132.9, 132.8, 130.7, 128.9, 126.6, 124.8, 123.2, 121.1, 118.4, 115.7, 107.9, 35.7; HRMS (ESI)  $m/z$  calculated for  $\text{C}_{14}\text{H}_{13}\text{N}_3\text{H}$   $[\text{M}+\text{H}]^+$  224.1186; found 224.1182.

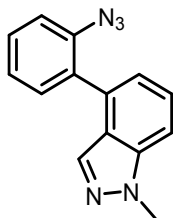

**4-(2-Azidophenyl)-1-methyl-1H-indazole (S32):** Following the General Procedure D, starting from 2-(1-methyl-1H-indazol-4-yl)aniline **S31** (0.39 g, 1.7 mmol), the crude mixture was purified by silica gel column chromatography (100 % hexanes  $\rightarrow$  15 % ethyl acetate in hexanes), to afford the desired product as a tan solid (0.29 g, 71 % yield).  $^1\text{H}$  NMR (400 MHz,  $\text{CDCl}_3$ )  $\delta$  = 7.84 (d,  $J$  = 0.7 Hz, 1H), 7.51-7.42 (m, 4H), 7.34 (d,  $J$  = 7.7 Hz, 1H), 7.30-7.26 (m, 1H), 7.16 (dd,  $J$  = 6.8, 0.9 Hz, 1H), 4.13 (s, 3H);  $^{13}\text{C}$  NMR (125 MHz,  $\text{CDCl}_3$ )  $\delta$  = 139.9, 137.7, 132.6, 131.6, 131.5, 131.4, 129.2, 126.0, 124.9, 123.4, 121.6, 118.9, 108.4, 35.6; HRMS (ESI)  $m/z$  calculated for  $\text{C}_{14}\text{H}_{11}\text{N}_5\text{H}$   $[\text{M}+\text{H}]^+$  250.1092; found 250.1087.

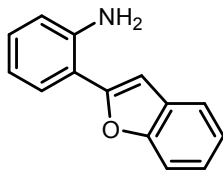

**2-(Benzofuran-2-yl)aniline (S33):** Following the General Procedure C, starting from 2-benzofuranylboronic acid (0.39 g, 2.4 mmol, 1.2 equiv.), the crude mixture was purified by silica gel column chromatography (100 % hexanes  $\rightarrow$  10 % ethyl acetate in hexanes), to afford the desired product as a brown solid (0.41 g, 99 % yield). NMR data was in accordance with what was previously reported.<sup>11</sup>

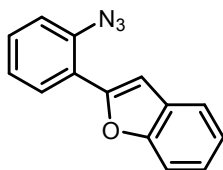

**2-(2-Azidophenyl)benzofuran (S34):** Following the General Procedure D, starting from 2-(benzofuran-2-yl)aniline **S33** (0.41 g, 1.99 mmol), the crude mixture was purified by silica gel column chromatography (100 % hexanes → 10 % ethyl acetate in hexanes), to afford the desired product as a yellow solid (0.34 g, 72 % yield). <sup>1</sup>H NMR (300 MHz, CDCl<sub>3</sub>) δ = 8.08 (dd, *J* = 7.8, 1.2 Hz, 1H), 7.63 (dd, *J* = 7.3, 1.5 Hz, 1H), 7.54-7.51 (m, 2H), 7.43-7.22 (m, 5H); <sup>13</sup>C NMR (100 MHz, CDCl<sub>3</sub>) δ = 154.0, 151.3, 136.3, 129.3, 129.1, 127.8, 124.9, 124.6, 122.9, 121.9, 121.3, 118.9, 110.9, 106.9; HRMS (ESI) *m/z* calculated for C<sub>14</sub>H<sub>9</sub>N<sub>3</sub>OH [M+H]<sup>+</sup> 236.0818; found 236.0822.

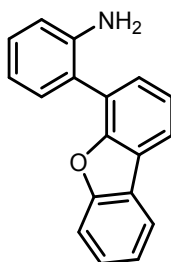

**2-(Dibenzo[*b,d*]furan-4-yl)aniline (S35):** Following the General Procedure C, starting from 4-(dibenzofuranyl)boronic acid (0.35 g, 1.7 mmol, 1.2 equiv.), the crude mixture was purified by silica gel column chromatography (100 % hexanes → 10 % ethyl acetate in hexanes), to afford the desired product as a white solid (0.26 g, 73 % yield). NMR data was in accordance with what was previously reported.<sup>12</sup>

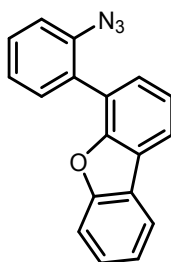

**4-(2-Azidophenyl)dibenzo[*b,d*]furan (S36):** Following the General Procedure D, starting from 2-(dibenzo[*b,d*]furan-4-yl)aniline **S35** (0.26 g, 1.0 mmol), the crude mixture was purified by silica gel column chromatography (100 % hexanes → 10 % ethyl acetate in hexanes), to afford the desired product as a white solid (0.25 g, 89 % yield). NMR data was in accordance with what was previously reported.<sup>13</sup>

<sup>11</sup> Carril, M.; SanMartin, R.; Tellitu, I.; Dominguez, E. *Org. Lett.* **2006**, 8, 1467-1470

<sup>12</sup> Rong, J.; Deng, L.; Tan, P.; Ni, C.; Gu, Y.; Hu, J. *Angew Chem., Int. Ed.* **2016**, 55, 2743-2747

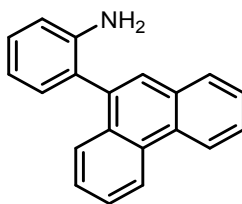

**2-(Phenanthren-9-yl)aniline (S37):** Following the General Procedure C, starting from 9-phenanthracenylboronic acid (0.53 g, 2.4 mmol, 1.2 equiv.), the crude mixture was purified by silica gel column chromatography (100 % hexanes → 10 % ethyl acetate in hexanes), to afford the desired product as a white solid (0.45 g, 84 % yield). NMR data was in accordance with what was previously reported.<sup>14</sup>

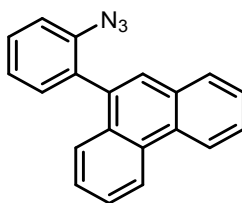

**9-(2-Azidophenyl)phenanthrene (S38):** Following the General Procedure D, starting from 2-(phenanthren-9-yl)aniline **S37** (0.45 g, 1.7 mmol), the crude mixture was purified by silica gel column chromatography (100 % hexanes → 10 % ethyl acetate in hexanes), to afford the desired product as a white solid (0.40 g, 81 % yield). <sup>1</sup>H NMR (400 MHz, CDCl<sub>3</sub>) δ = 8.79 (d, *J* = 8.2 Hz, 1H), 8.75 (d, *J* = 8.2 Hz, 1H), 7.90 (d, *J* = 7.7 Hz, 1H), 7.72-7.61 (m, 4H), 7.56-7.52 (m, 3H), 7.41 (dd, *J* = 7.5, 1.5 Hz, 1H), 7.35 (d, *J* = 7.9 Hz, 1H), 7.33-7.29 (m, 1H); (100 MHz, CDCl<sub>3</sub>) δ = 138.9, 134.9, 132.4, 132.2, 131.3, 131.1, 130.3 (2C), 129.2, 128.8, 128.1, 126.8 (2C), 126.7, 126.6, 126.5, 124.8, 122.9, 122.6, 118.4; HRMS (ESI) *m/z* calculated for C<sub>20</sub>H<sub>13</sub>N<sub>3</sub>NH<sub>4</sub> [M+NH<sub>4</sub>]<sup>+</sup> 313.1438; found 313.1448.

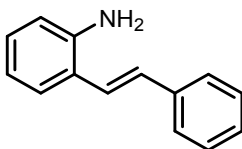

**(*E*)-2-Styrylaniline (S39):** Following the General Procedure C, starting from trans-2-phenylvinylboronic acid (0.53 g, 3.6 mmol, 1.2 equiv.), the crude mixture was purified by silica gel column chromatography (100 % hexanes → 10 % ethyl acetate in hexanes), to afford the desired product as a pale yellow solid (0.49 g, 83 % yield). NMR data was in accordance with what was previously reported.<sup>9</sup>

<sup>13</sup> Yang, L.; Li, H.; Zhang, H.; Lu, H. *Eur. J. Org. Chem.* **2016**, 5611-5615

<sup>14</sup> Wu, B.; Yoshikai, N. *Angew Chem., Int. Ed.* **2015**, 54, 8736-8739



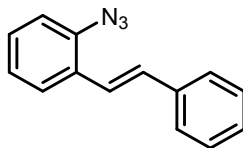

**(*E*)-1-Azido-2-styrylbenzene (S40):** Following the General Procedure D, starting from (*E*)-2-styrylaniline **S39** (0.20 g, 1.0 mmol), the crude mixture was purified by silica gel column chromatography (100 % hexanes → 10 % ethyl acetate in hexanes), to afford the desired product as a yellow solid (0.2 g, 88 % yield). NMR data was in accordance with what was previously reported.<sup>9</sup>

## SYNTHESIS OF CARBAZOLES

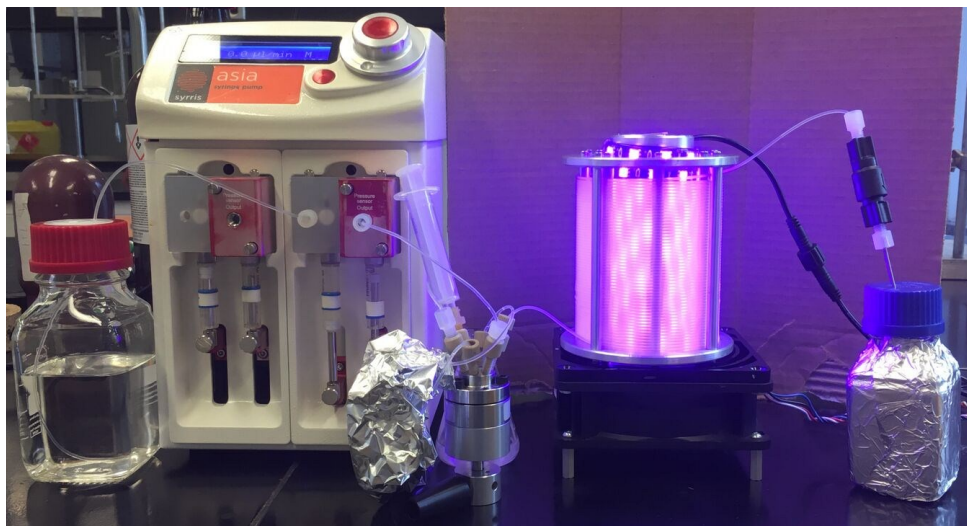

**Figure S1.** Continuous-flow reactor set-up used for the UV-light-mediated synthesis of heterocycles.

**Photodecomposition Procedure at 254 nm under Continuous-Flow (A):** A solution of biarylazide (0.15 mmol, 1.0 equiv.) and THF (5 mL, 30 mM) was injected via a syringe into an aluminium foil-covered 5 mL injection loop (6-way valve). The carrier solvent was pumped by a Syrris Asia pumping module. The pump was turned on at a flow rate of 1.6 mL/min. The reaction mixture was pumped through a 16 mL FEP-coiled reactor irradiated with 254 nm light source for a 10 minutes residence time. The collected solution was concentrated under vacuum to provide a crude reaction mixture which was purified by column chromatography on silica-gel (hexanes/ethyl acetate) to afford corresponding product.

**Photodecomposition Procedure at 394 nm under Continuous-Flow (B):** A solution of biarylazide (0.15 mmol, 1.0 equiv.) and THF (5 mL, 30 mM) was injected via a syringe into an aluminium foil-covered 5 mL injection loop (6-way valve). The carrier solvent was pumped by a Syrris Asia pumping module. The pump was turned on at a flow rate of 0.0542 mL/min. The reaction mixture was pumped through a 13 mL PFA-coiled reactor irradiated with 394 nm (purple LED light source) for a 4 hours residence time. The collected solution was concentrated under vacuum to provide a crude reaction mixture which was purified by column chromatography on silica-gel (hexanes/ethyl acetate) to afford corresponding product.

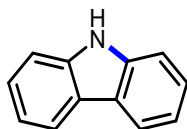

**9H-Carbazole (4):** Following the Photodecomposition Procedure A, starting from 2-azido-1,1'-biphenyl **1**, the crude mixture was purified by silica gel column chromatography (100 % hexanes → 10 % ethyl acetate in hexanes), to afford the desired product as a white solid (20.0 mg, 80 % yield). Following the Photodecomposition Procedure B, starting from 2-azido-1,1'-biphenyl **1**, the crude mixture was purified by silica gel column chromatography (100 % hexanes → 10 % ethyl acetate in hexanes), to afford the desired product as a white solid (20.0 mg, 80 % yield). NMR data was in accordance with what was previously reported.<sup>3</sup>

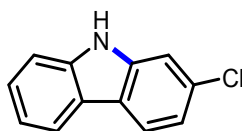

**2-Chloro-9H-carbazole (5):** Following the Photodecomposition Procedure A, starting from 2-azido-4'-chloro-1,1'-biphenyl, the crude mixture was purified by silica gel column chromatography (100 % hexanes → 10 % ethyl acetate in hexanes), to afford the desired product as a white solid (18.5 mg, 61 % yield). Following the Photodecomposition Procedure B, starting from 2-azido-4'-chloro-1,1'-biphenyl, the crude mixture was purified by silica gel column chromatography (100 % hexanes → 10 % ethyl acetate in hexanes), to afford the desired product as a yellow solid (22.8 mg, 81 % yield). NMR data was in accordance with what was previously reported.<sup>15</sup>

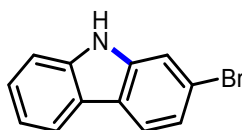

**2-Bromo-9H-carbazole (6):** Following the Photodecomposition Procedure A, starting from 2-azido-4'-bromo-1,1'-biphenyl, the crude mixture was purified by silica gel column chromatography (100 % hexanes → 10 % ethyl acetate in hexanes), to afford the desired product as a white solid (16.6 mg, 45 % yield). Following the Photodecomposition Procedure B, starting from 2-azido-4'-bromo-1,1'-biphenyl, the crude mixture was purified by silica gel column chromatography (100 % hexanes → 10 % ethyl acetate in hexanes), to afford the desired product as a white solid (29.6 mg, 80 % yield). NMR data was in accordance with what was previously reported.<sup>15</sup>

<sup>15</sup> Pan, J.; Wang, X.; Zhang, Y.; Buchwald, S. L. *Org. Lett.* **2011**, *13*, 4974-4976

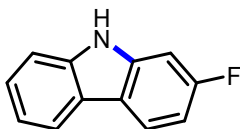

**2-Fluoro-9H-carbazole (7):** Following the Photodecomposition Procedure A, starting from 2-azido-4'-fluoro-1,1'-biphenyl, the crude mixture was purified by silica gel column chromatography (100 % hexanes → 10 % ethyl acetate in hexanes), to afford the desired product as a white solid (24.2 mg, 87 % yield). Following the Photodecomposition Procedure B, starting from 2-azido-4'-fluoro-1,1'-biphenyl and using ethyl acetate as the solvent, the crude mixture was purified by silica gel column chromatography (100 % hexanes → 10 % ethyl acetate in hexanes), to afford the desired product as a white solid (19.7 mg, 71 % yield). NMR data was in accordance with what was previously reported.<sup>3</sup>

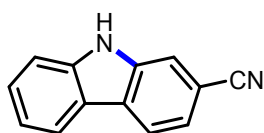

**2-Cyano-9H-carbazole (8):** Following the Photodecomposition Procedure A, starting from 2'-azido-[1,1'-biphenyl]-4-carbonitrile, the crude mixture was purified by silica gel column chromatography (100 % hexanes → 10 % ethyl acetate in hexanes), to afford the desired product as a white solid (22.5 mg, 78 % yield). Following the Photodecomposition Procedure B, starting from 2'-azido-[1,1'-biphenyl]-4-carbonitrile and using ethyl acetate as the solvent, the crude mixture was purified by silica gel column chromatography (100 % hexanes → 10 % ethyl acetate in hexanes), to afford the desired product as a white solid (19.9 mg, 69 % yield). NMR data was in accordance with what was previously reported.<sup>16</sup>

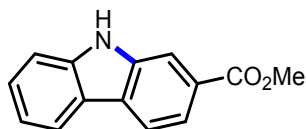

**Methyl 9H-carbazole-2-carboxylate (9):** Following the Photodecomposition Procedure A, starting from Methyl 2'-azido-[1,1'-biphenyl]-4-carboxylate, the crude mixture was purified by silica gel column chromatography (100 % hexanes → 10 % ethyl acetate in hexanes), to afford the desired product as a white solid (24.3 mg, 72 % yield). Following the Photodecomposition Procedure B, starting from Methyl 2'-azido-[1,1'-biphenyl]-4-carboxylate, the crude mixture was purified by silica gel column chromatography (100 % hexanes → 10 % ethyl acetate in hexanes), to afford the desired product as a white solid (27.7 mg, 82 % yield). NMR data was in accordance with what was previously reported.<sup>16</sup>

<sup>16</sup> Takamatsu, K.; Hirano, K.; Satoh, T.; Miura, M. *Org. Lett.* **2014**, *16*, 2892-2895

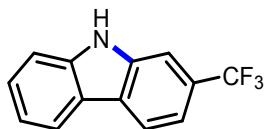

**2-(Trifluoromethyl)-9H-carbazole (10):** Following the Photodecomposition Procedure A, starting from 2-azido-4'-trifluoromethyl-1,1'-biphenyl, the crude mixture was purified by silica gel column chromatography (100 % hexanes → 10 % ethyl acetate in hexanes), to afford the desired product as a white solid (11.5 mg, 33 % yield). Following the Photodecomposition Procedure B, starting from 2-azido-4'-trifluoromethyl-1,1'-biphenyl and using ethyl acetate as the solvent, the crude mixture was purified by silica gel column chromatography (100 % hexanes → 10 % ethyl acetate in hexanes), to afford the desired product as a white solid (26.2 g, 74 % yield). NMR data was in accordance with what was previously reported.<sup>3</sup>

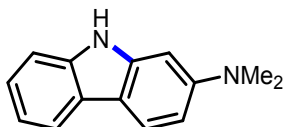

**2-(Dimethylamino)-9H-carbazole (11):** Following the Photodecomposition Procedure A, starting from 2'-azido-*N,N*-dimethyl-[1,1'-biphenyl]-4-amine, the crude mixture was purified by silica gel column chromatography (100 % hexanes → 10 % ethyl acetate in hexanes), to afford the desired product as a pale yellow solid (26.5 mg, 84 % yield). Following the Photodecomposition Procedure B, starting from 2'-azido-*N,N*-dimethyl-[1,1'-biphenyl]-4-amine and using ethyl acetate as the solvent, the crude mixture was purified by silica gel column chromatography (100 % hexanes → 10 % ethyl acetate in hexanes), to afford the desired product as a pale yellow solid (22.7 mg, 72 % yield). NMR data was in accordance with what was previously reported.<sup>16</sup>

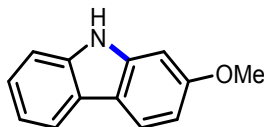

**2-Methoxy-9H-carbazole (12):** Following the Photodecomposition Procedure A, starting from 2-azido-4'-methoxy-1,1'-biphenyl, the crude mixture was purified by silica gel column chromatography (100 % hexanes → 10 % ethyl acetate in hexanes), to afford the desired product as a white solid (27.5 mg, 93 % yield). Following the Photodecomposition Procedure B, starting from 2-azido-4'-methoxy-1,1'-biphenyl and using ethyl acetate as the solvent, the crude mixture was purified by silica gel column chromatography (100 % hexanes → 10 % ethyl acetate in hexanes), to afford the desired product as a white solid (19.5 mg, 66 % yield). NMR data was in accordance with what was previously reported.<sup>3</sup>

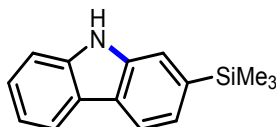

**2-Methoxy-9H-carbazole (13):** Following the Photodecomposition Procedure A, starting from 2-azido-4'-methoxy-1,1'-biphenyl, the crude mixture was purified by silica gel column chromatography (100 % hexanes → 10 % ethyl acetate in hexanes), to afford the desired product as a pale yellow solid (25.1 mg, 70 % yield). Following the Photodecomposition Procedure B, starting from 2-azido-4'-methoxy-1,1'-biphenyl, the crude mixture was purified by silica gel column chromatography (100 % hexanes → 10 % ethyl acetate in hexanes), to afford the desired product as a pale yellow solid (29.1 mg, 81 % yield). <sup>1</sup>H NMR (400 MHz, DMSO-d<sub>6</sub>) δ = 11.17 (s, 1H), 8.09 (m, 2H), 7.62 (s, 1H), 7.49 (d, *J* = 8.0 Hz, 1H), 7.40-7.37 (m, 1H), 7.29 (d, *J* = 7.4 Hz, 1H), 7.16-7.13 (m, 1H), 0.32 (s, 9H); <sup>13</sup>C NMR (100 MHz, DMSO-d<sub>6</sub>) δ = 139.8, 139.5, 136.4, 125.7, 122.9 (2C), 122.2, 120.2, 119.6, 118.4, 115.6, 110.9, -0.8; HRMS (ESI) *m/z* calculated for C<sub>15</sub>H<sub>17</sub>NSi [M-H]<sup>-</sup> 238.1052; found 238.1052.

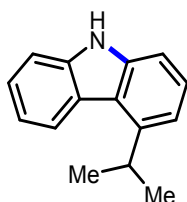

**4-Isopropyl-9H-carbazole (14):** Following the Photodecomposition Procedure A, starting from 2-azido-2'-isopropyl-1,1'-biphenyl, the crude mixture was purified by silica gel column chromatography (100 % hexanes → 10 % ethyl acetate in hexanes), to afford the desired product as a yellow solid (16.6 mg, 53 % yield). Following the Photodecomposition Procedure B, starting from 2-azido-2'-isopropyl-1,1'-biphenyl and using ethyl acetate as the solvent, the crude mixture was purified by silica gel column chromatography (100 % hexanes → 10 % ethyl acetate in hexanes), to afford the desired product as a yellow solid (16.0 mg, 51 % yield). <sup>1</sup>H NMR (400 MHz, DMSO-d<sub>6</sub>) δ = 11.29 (s, 1H), 8.11 (d, *J* = 8.1 Hz, 1H), 7.50 (d, *J* = 8.1 Hz, 1H), 7.39-7.31 (m, 3H), 7.19-7.15 (m, 1H), 7.08-7.03 (m, 1H), 3.92-3.82 (m, 1H), 1.41 (d, *J* = 6.8 Hz, 6H); <sup>13</sup>C NMR (100 MHz, DMSO-d<sub>6</sub>) δ = 143.9, 140.3, 140.1, 126.0, 125.2, 122.8, 122.2, 119.9, 119.1, 114.9, 111.2, 108.9, 30.2, 22.8 (2C); HRMS (ESI) *m/z* calculated for C<sub>15</sub>H<sub>15</sub>N [M-H]<sup>-</sup> 208.1130; found 208.1126.

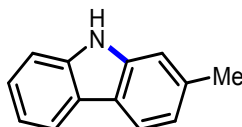

**2-Methyl-9H-carbazole (15):** Following the Photodecomposition Procedure A, starting from 2-azido-4'-methyl-1,1'-biphenyl, the crude mixture was purified by silica gel column chromatography (100 % hexanes → 10 % ethyl acetate in hexanes), to afford the

desired product as a white solid (18.8 mg, 69 % yield). Following the Photodecomposition Procedure B, starting from 2-azido-4'-methyl-1,1'-biphenyl, the crude mixture was purified by silica gel column chromatography (100 % hexanes → 10 % ethyl acetate in hexanes), to afford the desired product as a white solid (23.9 mg, 88 % yield). NMR data was in accordance with what was previously reported.<sup>3</sup>

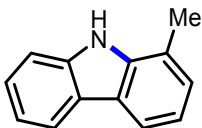

**1-Methyl-9H-carbazole (16):** Following the Photodecomposition Procedure A, starting from 2-azido-3'-methyl-1,1'-biphenyl, the crude mixture was purified by silica gel column chromatography (100 % hexanes → 10 % ethyl acetate in hexanes), to afford an inseparable mixture of regioisomers as a pale yellow solid (21.5 mg, 79 % yield, 70:30). Following the Photodecomposition Procedure B, starting from 2-azido-3'-methyl-1,1'-biphenyl, the crude mixture was purified by silica gel column chromatography (100 % hexanes → 10 % ethyl acetate in hexanes), to afford an inseparable mixture of regioisomers as a pale yellow solid (25.8 mg, 95 % yield, 53:47). NMR data was in accordance with what was previously reported.<sup>3</sup>

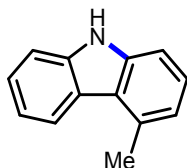

**4-Methyl-9H-carbazole (17):** Following the Photodecomposition Procedure A, starting from 2-azido-2'-methyl-1,1'-biphenyl, the crude mixture was purified by silica gel column chromatography (100 % hexanes → 10 % ethyl acetate in hexanes), to afford the desired product as a white solid (22.6 mg, 83 % yield). Following the Photodecomposition Procedure B, starting from 2-azido-2'-methyl-1,1'-biphenyl and using ethyl acetate as the solvent, the crude mixture was purified by silica gel column chromatography (100 % hexanes → 10 % ethyl acetate in hexanes), to afford the desired product as a white solid (24.5 mg, 90 % yield). NMR data was in accordance with what was previously reported.<sup>3</sup>

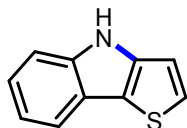

**4H-Thieno[3,2-b]indole (18):** Following the Photodecomposition Procedure A, starting from 2-(2-azidophenyl)thiophene, the crude mixture was purified by silica gel column chromatography (100 % hexanes → 10 % ethyl acetate in hexanes), to afford the desired product as a white solid (17.9 mg, 69 % yield). Following the Photodecomposition Procedure B, starting from 2-(2-azidophenyl)thiophene, the crude mixture was purified



by silica gel column chromatography (100 % hexanes → 10 % ethyl acetate in hexanes), to afford the desired product as a white solid (19.7 mg, 76 % yield). NMR data was in accordance with what was previously reported.<sup>16</sup>

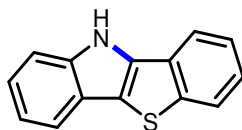

**10H-Benzo[4,5]thieno[3,2-*b*]indole (19):** Following the Photodecomposition Procedure A, starting from 2-(2-azidophenyl)benzo[*b*]thiophene, the crude mixture was purified by silica gel column chromatography (100 % hexanes → 10 % ethyl acetate in hexanes), to afford the desired product as a white solid (24.1 mg, 72 % yield). Following the Photodecomposition Procedure B, starting from 2-(2-azidophenyl)benzo[*b*]thiophene, the crude mixture was purified by silica gel column chromatography (100 % hexanes → 10 % ethyl acetate in hexanes), to afford the desired product as a white solid (19.1 mg, 57 % yield). NMR data was in accordance with what was previously reported.<sup>16</sup>

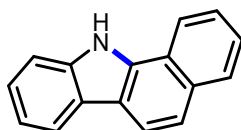

**11H-Benzo[*a*]carbazole (20):** Following the Photodecomposition Procedure A, starting from 2-(2-azidophenyl)naphthalene, the crude mixture was purified by silica gel column chromatography (100 % hexanes → 10 % ethyl acetate in hexanes), to afford the desired product as a white solid (22.5 mg, 69 % yield). Following the Photodecomposition Procedure B, starting from 2-(2-azidophenyl)naphthalene, the crude mixture was purified by silica gel column chromatography (100 % hexanes → 10 % ethyl acetate in hexanes), to afford the desired product as a white solid (27.4 mg, 84 % yield). NMR data was in accordance with what was previously reported.<sup>17</sup>

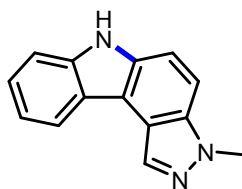

**3-Methyl-3,6-dihydropyrazolo[3,4-*c*]carbazole (21):** Following the Photodecomposition Procedure A, starting from 4-(2-azidophenyl)-1-methyl-1*H*-indazole, the crude mixture was purified by silica gel column chromatography (100 % hexanes → 25 % ethyl acetate in hexanes), to afford the desired product as a yellow solid (23.2 mg, 70 % yield). Following the Photodecomposition Procedure B, starting from 4-(2-azidophenyl)-1-methyl-1*H*-indazole, the crude mixture was purified by silica gel

<sup>17</sup> Budén, M. E.; Vaillard, V. A.; Martin, S. E.; Rossi, R. A. *J. Org. Chem.* **2009**, *74*, 4490-4498



column chromatography (100 % hexanes  $\rightarrow$  25 % ethyl acetate in hexanes), to afford the desired product as a yellow solid (28.5 mg, 86 % yield).  $^1\text{H}$  NMR (400 MHz, DMSO- $\text{d}_6$ )  $\delta$  = 11.49 (s, 1H) 8.57 (d,  $J$  = 0.9 Hz, 1H), 8.32 (d,  $J$  = 8.1 Hz, 1H), 7.67 (dd,  $J$  = 9.0, 0.7 Hz, 1H), 7.62 (d,  $J$  = 8.8 Hz, 1H) 7.57 (d,  $J$  = 8.1 Hz, 1H) 7.40-7.37 (m, 1H), 7.24-7.20 (m, 1H), 4.15 (s, 3H);  $^{13}\text{C}$  NMR (100 MHz, DMSO- $\text{d}_6$ )  $\delta$  = 138.8, 135.7, 134.2, 129.7, 124.4, 121.8, 121.1, 118.6, 116.8, 112.2, 111.5, 111.3, 108.1, 35.8; HRMS (ESI)  $m/z$  calculated for  $\text{C}_{14}\text{H}_{11}\text{N}_3\text{H} [\text{M}+\text{H}]^+$  222.1036; found 222.1026.

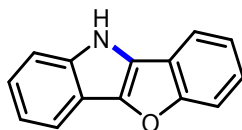

**10H-Benzofuro[3,2-*b*]indole (22):** Following the Photodecomposition Procedure A, starting from 2-(2-azidophenyl)benzofuran, the crude mixture was purified by silica gel column chromatography (100 % hexanes  $\rightarrow$  10 % ethyl acetate in hexanes), to afford the desired product as a white solid (23.6 g, 76 % yield). Following the Photodecomposition Procedure B, starting from 2-(2-azidophenyl)benzofuran, the crude mixture was purified by silica gel column chromatography (100 % hexanes  $\rightarrow$  10 % ethyl acetate in hexanes), to afford the desired product as a white solid (14.6 mg, 47 % yield). NMR data was in accordance with what was previously reported.<sup>16</sup>

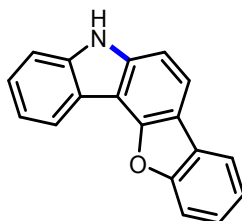

**5H-Benzofuro[3,2-*c*]carbazole (23):** Following the Photodecomposition Procedure A, starting from 4-(2-azidophenyl)dibenzo[*b,d*]furan, the crude mixture was purified by silica gel column chromatography (100 % hexanes  $\rightarrow$  10 % ethyl acetate in hexanes), to afford the desired product as a yellow crystalline solid (22.0 mg, 57 % yield). Following the Photodecomposition Procedure B, starting from 4-(2-azidophenyl)dibenzo[*b,d*]furan, the crude mixture was purified by silica gel column chromatography (100 % hexanes  $\rightarrow$  10 % ethyl acetate in hexanes), to afford the desired product as a yellow crystalline solid (35.9 mg, 93 % yield). NMR data was in accordance with what was previously reported.<sup>13</sup>

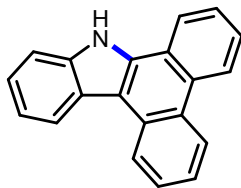

**9H-Dibenzo[*a,c*]carbazole (24):** Following the Photodecomposition Procedure A, starting from 9-(2-Azidophenyl)phenanthrene, the crude mixture was purified by silica gel column chromatography (100 % hexanes → 10 % ethyl acetate in hexanes), to afford the desired product as a yellow solid (30.5 mg, 76 % yield). Following the Photodecomposition Procedure B, starting from 2-azido-1,1'-biphenyl, the crude mixture was purified by silica gel column chromatography (100 % hexanes → 10 % ethyl acetate in hexanes), to afford the desired product as a yellow solid (22.1 mg, 55 % yield). NMR data was in accordance with what was previously reported.<sup>17</sup>

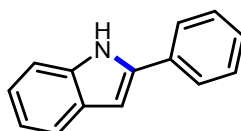

**2-Phenyl-1H-indole (25):** Following the Photodecomposition Procedure A, starting from (*E*)-1-Azido-2-styrylbenzene, the crude mixture was purified by silica gel column chromatography (100 % hexanes → 10 % ethyl acetate in hexanes), to afford the desired product as a white solid (19.6 mg, 66 % yield). Following the Photodecomposition Procedure B, starting from 2-azido-1,1'-biphenyl, the crude mixture was purified by silica gel column chromatography (100 % hexanes → 10 % ethyl acetate in hexanes), to afford the desired product as a white solid (22.9 mg, 79 % yield). NMR data was in accordance with what was previously reported.<sup>18</sup>

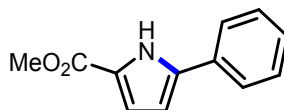

**Methyl 5-phenyl-1H-pyrrole-2-carboxylate (26):** Following the Photodecomposition Procedure A, starting from 2-azido-1,1'-biphenyl, the crude mixture was purified by silica gel column chromatography (100 % hexanes → 10 % ethyl acetate in hexanes), to afford the desired product as a white solid (15.1 mg, 50 % yield). Following the Photodecomposition Procedure B, starting from 2-azido-1,1'-biphenyl, the crude mixture was purified by silica gel column chromatography (100 % hexanes → 10 % ethyl acetate in hexanes), to afford the desired product as a white solid (25.1 mg, 83 % yield). NMR data was in accordance with what was previously reported.<sup>19</sup>

<sup>18</sup> Shen, M.; Leslie, B. E.; Driver, T. G. *Angew. Chem., Int. Ed.* **2008**, 47, 5056-5059

<sup>19</sup> Dong, H.; Shen, M.; Redford, J. E.; Stokes, B. J.; Pumphrey, A. L.; Driver, T. G. *Org. Lett.* **2007**, 9, 5191-5194

## SYNTHESIS OF METHYL CARPROFEN

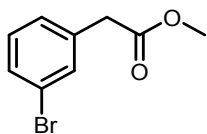

**Methyl 2-(3-bromophenyl)acetate (S41):** An oven-dried sealed tube was charged with 3-bromophenyl acetic acid (2.15 g, 10 mmol, 1 equiv.), sulfuric acid (catalytic amount) and methanol (20 mL, 0.5 M). The mixture was stirred at 65 °C for 16 h. Upon cooling, the reaction mixture was diluted with ethyl acetate (50 mL) and water (50 mL), the phases were separated. The aqueous phase was extracted twice with EtOAc (20 mL) and the combined organic phases were washed with brine (50 mL). The organic phases were dried over Na<sub>2</sub>SO<sub>4</sub>, filtered and concentrated. The crude mixture was purified by silica gel column chromatography (100 % hexanes → 10 % ethyl acetate in hexanes), to afford the desired product as a clear oil (2.07 g, 90 % yield). NMR data was in accordance with what was previously reported.<sup>20</sup>

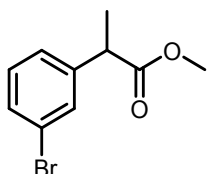

**Methyl 2-(3-(4-chlorophenyl)amino)phenylpropanoate (27):** Methyl 2-(3-bromophenyl)acetate **S41** (1.77 g, 7.7 mmol) in dry THF (15 mL) was added dropwise to a stirred solution of lithium diisopropylamide (LDA) (8.9 mmol, 1.15 equiv.) in THF (20 mL) at -78 °C under nitrogen (N<sub>2</sub>), and after 30 min, iodomethane (0.5 mL, 8.1 mmol) was added slowly. The resulting solution was stirred for 2 h with the temperature changed from -78 to 0 °C, then evaporated to dryness, and extracted with CH<sub>2</sub>Cl<sub>2</sub> (50 mL). The organic phases were dried over Na<sub>2</sub>SO<sub>4</sub>, filtered and concentrated. The crude mixture was purified by silica gel column chromatography (100 % hexanes → 10 % ethyl acetate in hexanes), to afford the desired product as a clear oil (1.28 g, 68 % yield). NMR data was in accordance with what was previously reported.<sup>21</sup>

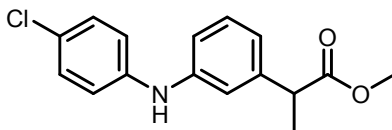

**Methyl 2-(3-((4-chlorophenyl)amino)phenyl)propanoate (27):** An oven-dried sealed tube was charged with 4-chloroaniline (0.42 g, 3.3 mmol, 1.1 equiv.), Cs<sub>2</sub>CO<sub>3</sub> (1.47 g, 4.5 mmol, 1.5 equiv.), xPhos (0.11 mg, 0.24 mmol, 8 mol %), Pd<sub>2</sub>(dba)<sub>3</sub> (27.0 mg, 0.12

<sup>20</sup> Hutchby, M.; Houlden, C. E.; Haddow, M. F.; Tyler, S. N. G.; Lloyd-Jones, G. C.; Booker-Milburn, K. *I. Angew. Chem., Int. Ed.* **2012**, *51*, 548-551

<sup>21</sup> Dang, T.T.; Seayad A. M. *Adv. Synth. Catal.* **2016**, *358*, 3373 –3380

mmol, 4 mol %), anhydrous toluene (15 mL, 0.20 M) and methyl 2-(3-bromophenyl)propanoate **S42** (0.73 g, 3.0 mmol, 1.0 equiv.) under a nitrogen atmosphere. The mixture was stirred at 100 °C for 24 h under nitrogen. Upon cooling, the reaction mixture was diluted with dichloromethane (30 mL), filtered on Celite® and then dried over Na<sub>2</sub>SO<sub>4</sub>. Concentration under reduced pressure afforded the crude product that was purified by silica gel column chromatography (5% ethyl acetate in hexanes) to afford the desired product as yellow oil (0.67 g, 77 %). <sup>1</sup>H NMR (400 MHz, CDCl<sub>3</sub>) δ = 7.25-7.21 (m, 3H), 7.01-6.95 (m, 4H), 6.89-6.87 (m, 1H), 5.61 (brs, 1H), 3.71-3.66 (m, 4H), 1.49 (d, *J* = 7.2 Hz, 3H); <sup>13</sup>C NMR (100 MHz, CDCl<sub>3</sub>) δ = 174.9, 142.9, 141.7, 141.5, 129.5, 129.1, 125.3, 120.2, 118.7, 116.8, 116.2, 51.9, 45.2, 18.3; HRMS (ESI) *m/z* calculated for C<sub>16</sub>H<sub>16</sub>ClNO<sub>2</sub>H [M+H]<sup>+</sup> 290.0929; found 290.0942.

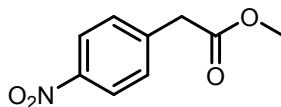

**Methyl 2-(4-nitrophenyl)acetate (S43):** An oven-dried sealed tube was charged with 4-nitrophenyl acetic acid (5.44 g, 30 mmol, 1 equiv.), sulfuric acid (catalytic amount) and methanol (30 mL, 1 M). The mixture was stirred at 65 °C for 16 h. Upon cooling, the reaction mixture was diluted with ethyl acetate (60 mL) and water (60 mL), the phases were separated. The aqueous phase was extracted twice with EtOAc (30 mL) and the combined organic phases were washed with brine (60 mL). The organic phases were dried over Na<sub>2</sub>SO<sub>4</sub>, filtered and concentrated. The crude mixture was purified by silica gel column chromatography (100 % hexanes → 10 % ethyl acetate in hexanes), to afford the desired product as a yellow solid (5.6 g, 96 % yield). NMR data was in accordance with what was previously reported.<sup>20</sup>

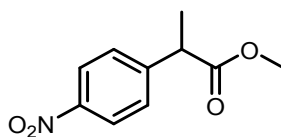

**Methyl 2-(4-nitrophenyl)propanoate (S44):** An oven-dried round-bottom flask, was charged with methyl 2-(4-nitrophenyl)acetate **S43** (1.01 g, 5.17 mmol, 1.0 equiv.), sodium hydride (0.20 g, 4.92 mmol, 0.95 equiv.) and anhydrous THF (10 mL, 0.52 M). The mixture was stirred at 0 °C and iodomethane (0.48 mL, 7.76 mmol, 1.5 equiv.) was added dropwise. The mixture was warmed to room temperature and the reaction was followed by TLC until completion. The reaction mixture was diluted with ethyl acetate (50 mL) and water (50 mL), the phases were separated. The aqueous phase was extracted twice with EtOAc (20 mL) and the combined organic phases were washed with brine (50 mL). The organic phases were dried over Na<sub>2</sub>SO<sub>4</sub>, filtered and concentrated. The crude mixture was purified by silica gel column chromatography (100 % hexanes → 20 % ethyl acetate in hexanes), to afford the desired product as a yellow oil (1.08 g, 94 % yield). NMR data was in accordance with what was previously reported.<sup>22</sup>

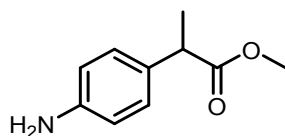

**Methyl 2-(4-aminophenyl)propanoate (S45):** An oven-dried round-bottom flask, was charged with methyl 2-(4-nitrophenyl)propanoate **S44** (0.30 g, 1.4 mmol, 1.0 equiv.), palladium on charcoal (10% Pd, 0.15 g) and methanol (14 mL, 0.125 M). The mixture was hydrogenated (1 atm of H<sub>2</sub>) until complete disappearance (4-5h) of the starting material (TLC). After filtration on a pad of Celite, the crude mixture was purified by silica gel column chromatography (100 % hexanes → 20 % ethyl acetate in hexanes), to afford the desired product as a yellow solid (0.22 g, 89 % yield). NMR data was in accordance with what was previously reported.<sup>23</sup>

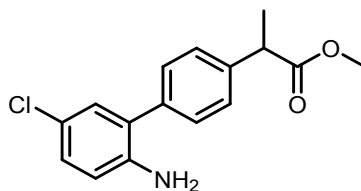

**Methyl 2-(2'-amino-5'-chloro-[1,1'-biphenyl]-4-yl)propanoate (S46):** A round-bottom flask was charged with methyl 2-(4-aminophenyl)propanoate **S45** (0.11 g, 0.6 mmol, 1.0 equiv.), sodium nitrite (46 mg, 0.66 mmol, 1.1 equiv.) and a mixture of methanol/HCl [6M] (0.33 M, 2:1). The mixture was cooled to 0 °C and stirred for 1 hour. Bis(pinacolato)diboron (0.17 g, 0.66 mmol, 1.1 equiv.) was added to the mixture and stirred for an additional 2 hours at room temperature. The solution was diluted with CH<sub>2</sub>Cl<sub>2</sub> (20 mL) and basified by the slow addition of saturated aqueous K<sub>2</sub>CO<sub>3</sub> until bubbling ceased. The phases were separated and the aqueous phase was extracted twice with CH<sub>2</sub>Cl<sub>2</sub> (20 mL). The combined organic phases were washed with water (50 mL) and brine (50 mL). The organic phases were dried over Na<sub>2</sub>SO<sub>4</sub>, filtered and concentrated. The crude mixture was submitted to General Procedure C, starting from methyl 2-(4-(4,4,5,5-tetramethyl-1,3,2-dioxaborolan-2-yl)phenyl)propanoate (0.25 g, 1.1 mmol, 1.1 equiv.), the crude mixture was purified by silica gel column chromatography (100 % hexanes → 20 % ethyl acetate in hexanes), to afford the desired product as a pale yellow oil (0.14 g, 62 % yield). <sup>1</sup>H NMR (400 MHz, CDCl<sub>3</sub>) δ = 7.39 (s, 4H), 7.11-7.09 (m, 2H), 6.69-6.67 (m, 1H), 3.81-3.76 (m, 3H), 3.71 (s, 3H), 1.55 (d, *J* = 7.2 Hz, 3H); <sup>13</sup>C NMR (100 MHz, CDCl<sub>3</sub>) δ = 174.8, 142.2, 139.9, 137.1, 129.9, 129.1, 128.4, 128.1, 128.0, 123.1, 116.6, 52.1, 45.1, 18.5; HRMS (ESI) *m/z* calculated for C<sub>16</sub>H<sub>16</sub>ClNO<sub>2</sub>H [M+H]<sup>+</sup> 290.0930; found 290.0942.

<sup>22</sup> Hama, T.; Ge, S.; Hartwig, J. F. *J. Org. Chem.* **2013**, 78, 8250-8266

<sup>23</sup> Verma, A.; Patel, S.; Meenakshi; Kumar, A.; Yadav, A.; Kumar, S.; Jana, S.; Sharma, S.; Prasad, C. D.; Kumar, S. *Chem. Commun.* **2015**, 51, 1371-1374

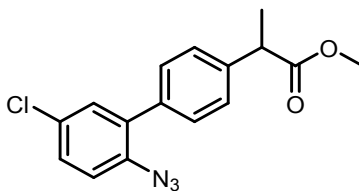

**Methyl 2-(2'-azido-5'-chloro-[1,1'-biphenyl]-4-yl)propanoate (28):** Following the General Procedure D, starting from methyl 2-(2'-amino-5'-chloro-[1,1'-biphenyl]-4-yl)propanoate **S46** (0.25 g, 0.87 mmol), the crude mixture was purified by silica gel column chromatography (100 % hexanes → 10 % diethyl ether in hexanes), to afford the desired product as a clear oil (0.22 g, 79 % yield).  $^1\text{H}$  NMR (400 MHz,  $\text{CDCl}_3$ )  $\delta$  = 7.42-7.32 (m, 6H), 7.18 (d,  $J$  = 8.4 Hz, 1H), 3.79 (q,  $J$  = 7.2 Hz, 1H), 3.70 (s, 3H), 1.55 (d,  $J$  = 7.2 Hz, 3H); (100 MHz,  $\text{CDCl}_3$ )  $\delta$  = 174.8, 140.3, 135.7, 135.6, 134.7, 131.0, 130.2, 129.5, 128.5, 127.4, 120.0, 52.1, 45.1, 18.5; HRMS (ESI)  $m/z$  calculated for  $\text{C}_{16}\text{H}_{14}\text{ClN}_3\text{O}_2\text{NH}_4$   $[\text{M}+\text{NH}_4]^+$  333.1123; found 333.1113.

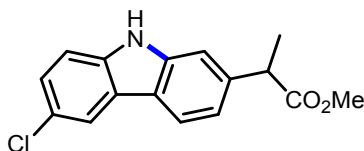

**Methyl 2-(6-chloro-9H-carbazol-2-yl)propanoate (29):** Following the Photodecomposition Procedure A, starting from methyl 2-(2'-azido-5'-chloro-[1,1'-biphenyl]-4-yl)propanoate **28**, the crude mixture was purified by silica gel column chromatography (100 % hexanes → 15 % ethyl acetate in hexanes), to afford the desired product as a white solid (21.6 mg, 50 % yield). Following the Photodecomposition Procedure B, starting from methyl 2-(2'-azido-5'-chloro-[1,1'-biphenyl]-4-yl)propanoate **28**, the crude mixture was purified by silica gel column chromatography (100 % hexanes → 15 % ethyl acetate in hexanes), to afford the desired product as a white solid (27.6 mg, 64 % yield). NMR data was in accordance with what was previously reported.<sup>24</sup>

<sup>24</sup> Louillat, M.-L.; Biafora, A.; Legros, F.; Patureau, F. W. *Angew. Chem. Int. Ed.* **2014**, 53, 3505-3509

## KINETIC ISOTOPE EFFECTS

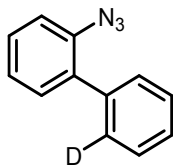

**2-Azido-1,1'-biphenyl-2'-*d* (30):** Following the General Procedure D, starting from [1,1'-biphenyl]-2'-*d*-2-amine <sup>[9]</sup> (0.27 g, 1.6 mmol), the crude mixture was purified by silica gel column chromatography (100 % hexanes → 10 % ethyl acetate in hexanes), to afford the desired product as a tan oil (0.23 g, 74 % yield), <sup>1</sup>H NMR showed 95 % deuterium incorporation. NMR data was in accordance with what was previously reported.<sup>9</sup>

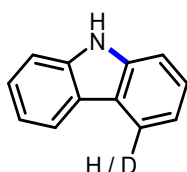

**9*H*-Carbazole-4-*d* (*d*-31 or 31):** Following the Photodecomposition Procedure A, starting from 2-azido-1,1'-biphenyl-2'-*d* **30**, the crude mixture was purified by silica gel column chromatography (100 % hexanes → 10 % ethyl acetate in hexanes), to afford the desired product as a white solid (20.1 mg, 80 % yield,  $K_H / K_D = 1.04$ ). NMR data was in accordance with what was previously reported.<sup>3</sup>

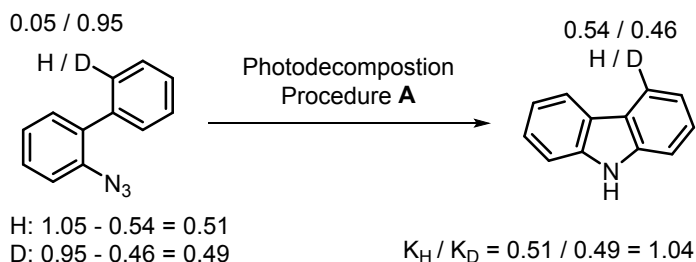

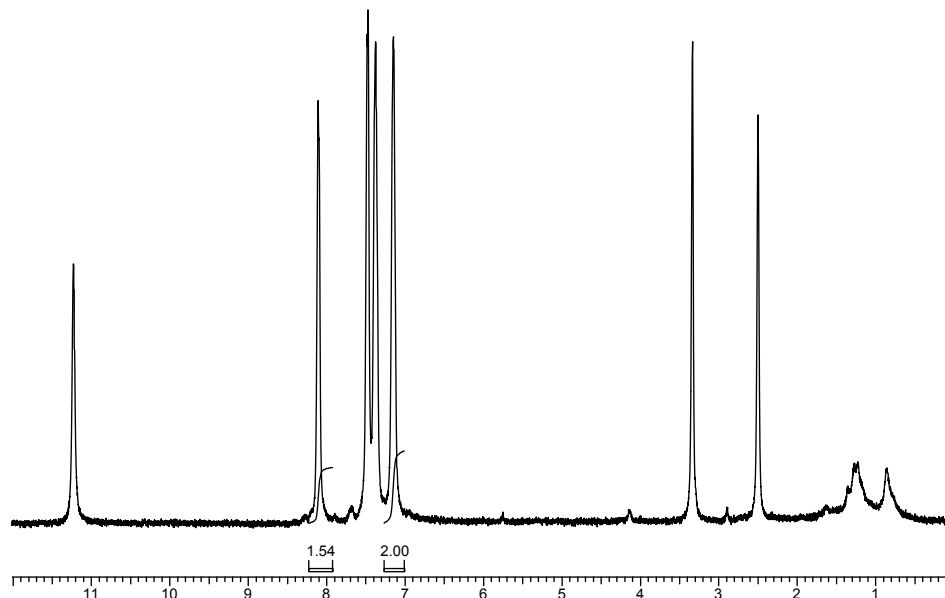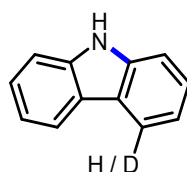

**9H-Carbazole-4-d (*d*-31 or 31):** Following the Photodecomposition Procedure B for 2 hours (0.108 mL/min), starting from 2-azido-1,1'-biphenyl-2'-d **30** and using ethyl acetate as the solvent, the crude mixture was purified by silica gel column chromatography (100 % hexanes → 10 % ethyl acetate in hexanes), to afford the desired product as a white solid (20.1 mg, 80 % yield,  $K_H / K_D = 0.96$ ). NMR data was in accordance with what was previously reported.<sup>3</sup>

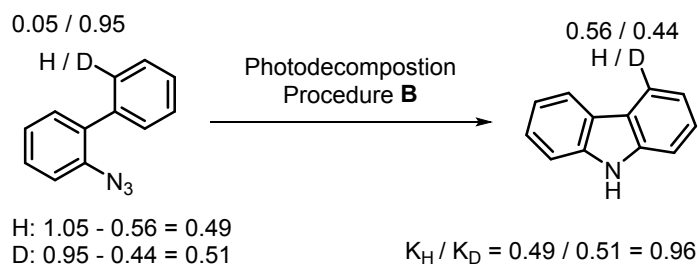



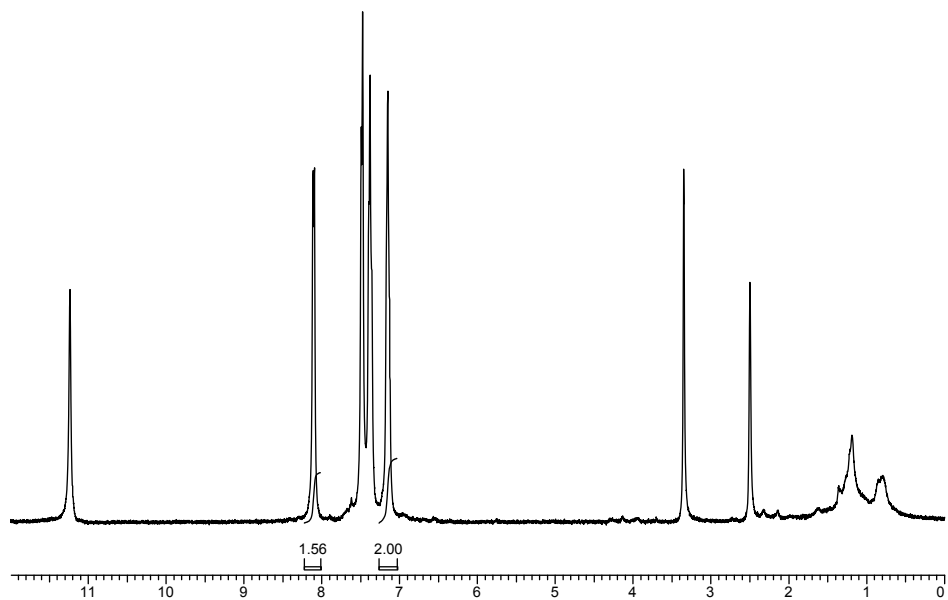

## BACKGROUND ON LIGHT SOURCES

For reactions using irradiation at 254 nm, a previously published experimental set up was used: A. Caron, A. C. Hernandez-Perez and S. K. Collins *Org. Process Res. Dev.* 2014, **18**, 1571. The UV light sources was purchased from Luzchem (<http://www.luzchem.com/>). The following data is available online for the UVC lamp used:

Chamber Temp. 25 °C

Photoreactor model LZC-ICH2

Monitored range 235 to 850 nm

Resolved peaks : 254, 313, 365, 405, 435, 546, 762 nm

The following data was reproduced from the Luzchem website :

(<http://www.luzchem.com/ExposureStandards.php> )

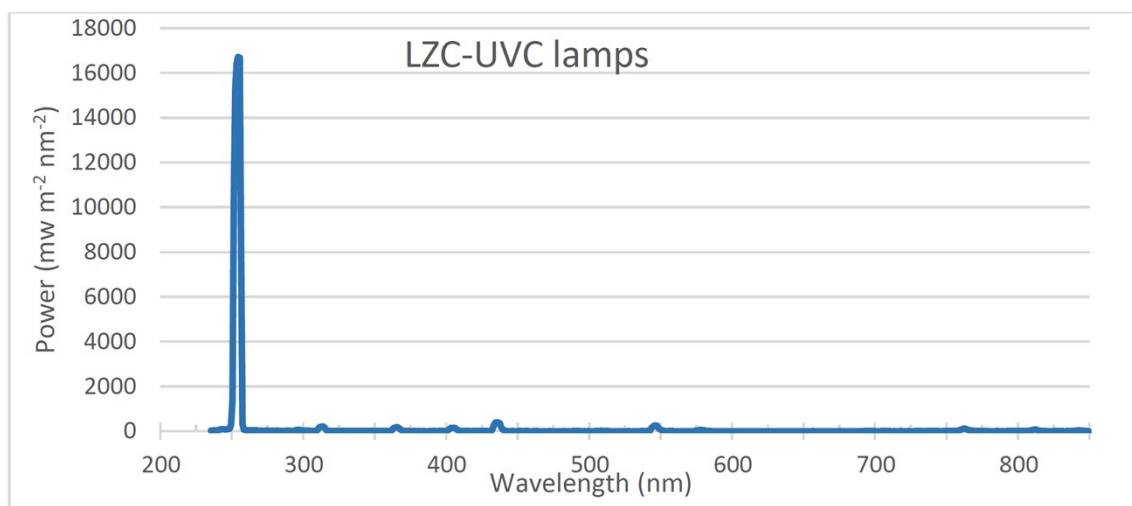

| Region  | Range, nm | Dose mw*m <sup>-2</sup> | % energy |
|---------|-----------|-------------------------|----------|
| UVA     | 315-400   | 1,300                   | 1%       |
| UVB     | 280-315   | 1,430                   | 2%       |
| UVC     | 235-280   | 88,340                  | 90%      |
| Visible | 400-700   | 5,070                   | 5%       |
| NIR     | 700-850   | 1,680                   | 2%       |

For reactions using irradiation at 394 nm, the light source was purchased from Creative Lighting (<https://www.creativelightings.com/>). The LED strips used were: <http://www.creativelightings.com/Purple-UV-LED-Flex-Strips-12vdc-WP-300-Meter-p/cl-frs5050wpdd-5m-12v-uv.htm>. The following data was reproduced from the Creative Lightings website :

Purple/UV Water Resistant LED Flexible Ribbon Spool - 5050 Series - 300 Purple/UV LEDs 400-410nm

Standard length: 5 meters (16.4ft)/reel

Strip width: single color 10mm, (3/8in)

Color of PCB: Black, Silicone PVC encapsulated, super flexible

Color: Purple **Ultra Violet / Purple** (1/2 the normal brightness - MORE UV REACTIVE) 400-410nm

Working voltage: 12 Volt DC (24v Optional)

LED quantity of entire strip: single color **300pcs**, RGB 150pcs or 300pcs

LED Density: Double Density = .75" LED spacing - Provides high output and more even light output

Lifespan (approx. 100,000 hours)

Wattage: 72 Watts per 5 Meter Spool

Water resistant/Rustproof IP-66 rated

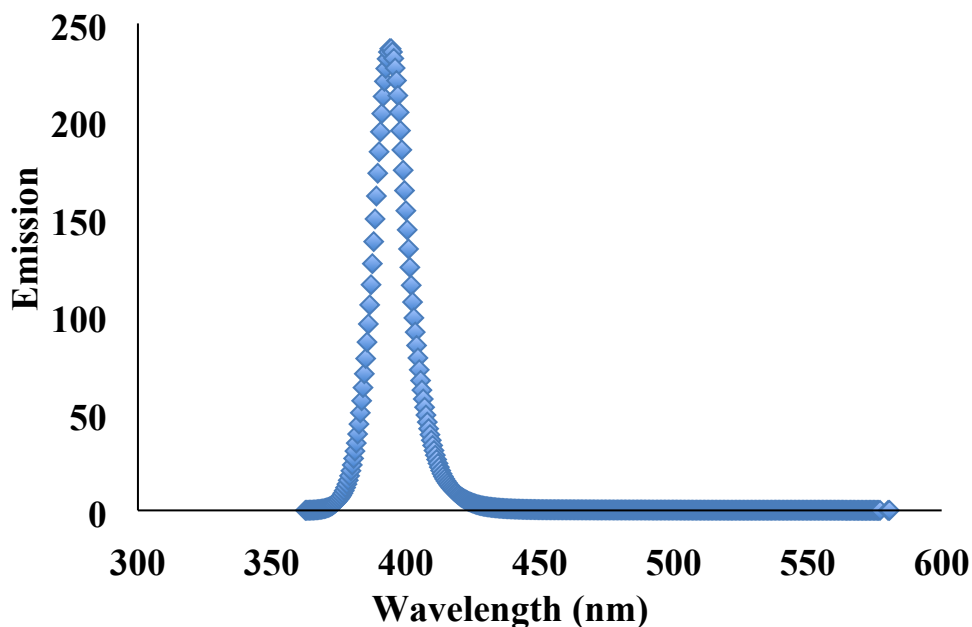

## ABSORPTION/EMISSION DATA

Absorption spectrum for 2-azido-1,1'-biphenyl (**1**) (25  $\mu\text{M}$  in THF)

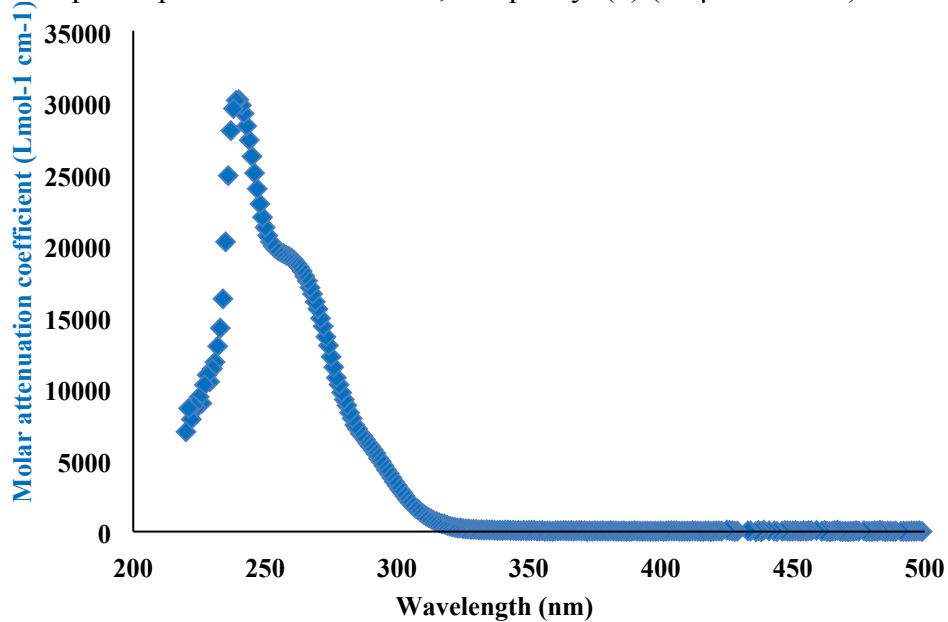

Overlapping the absorption spectrum for 2-azido-1,1'-biphenyl (**1**) with the emission spectrum of the purple LED at the concentration used for the photochemical decomposition of the azide (30 mM in THF)

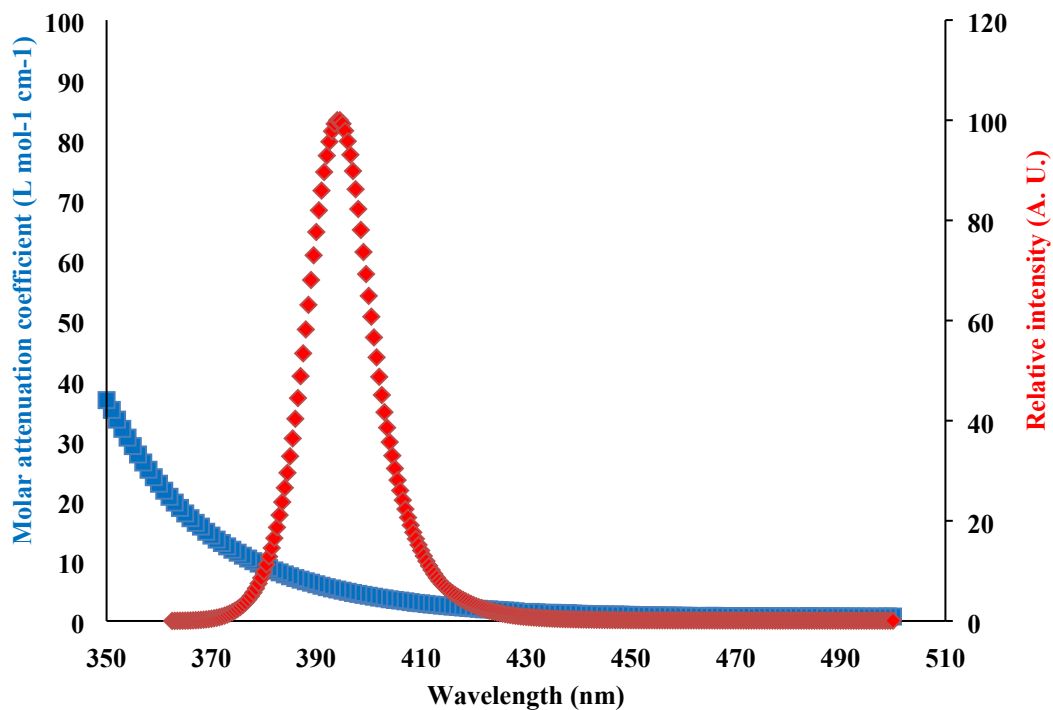

## NMR DATA FOR ALL NEW COMPOUNDS

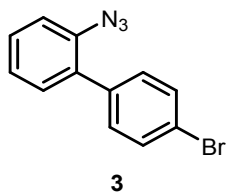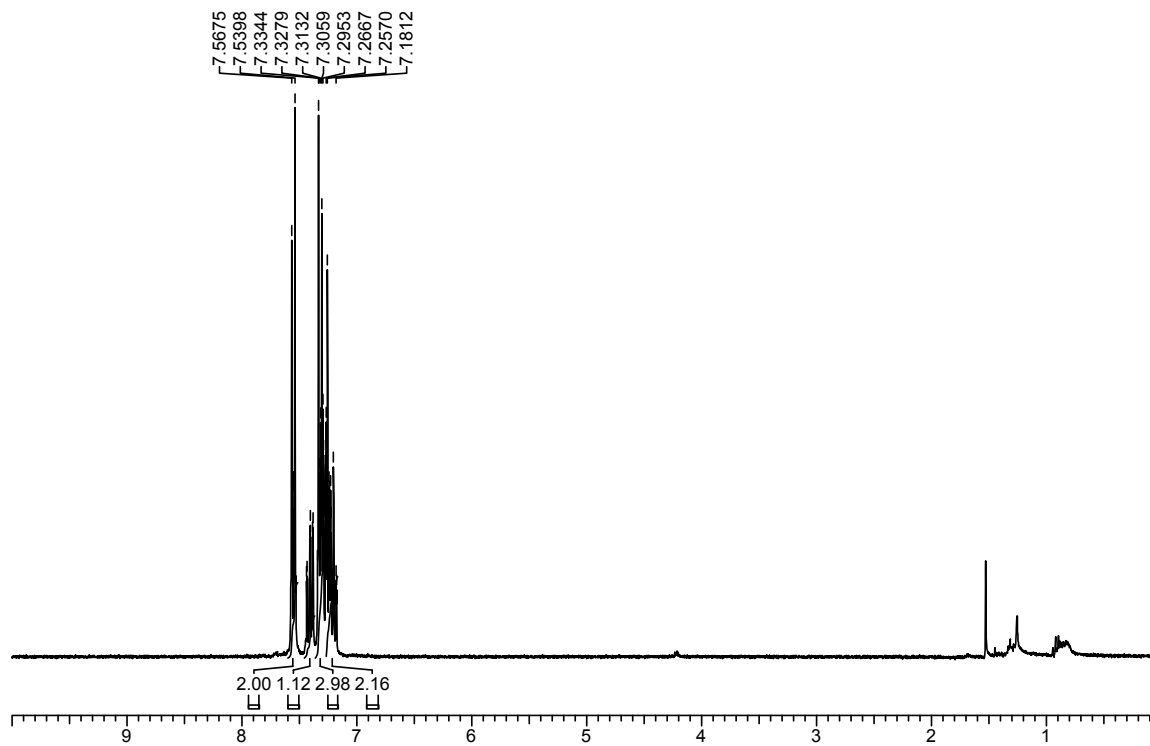

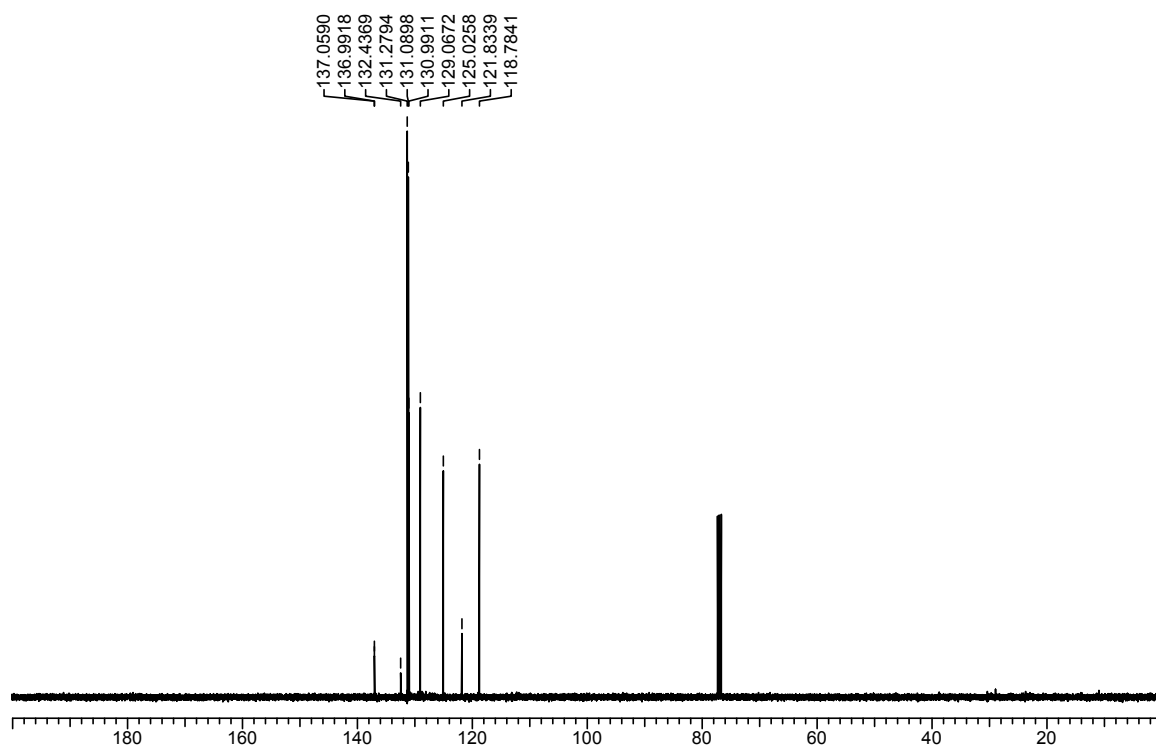

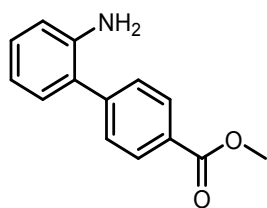

**S7**

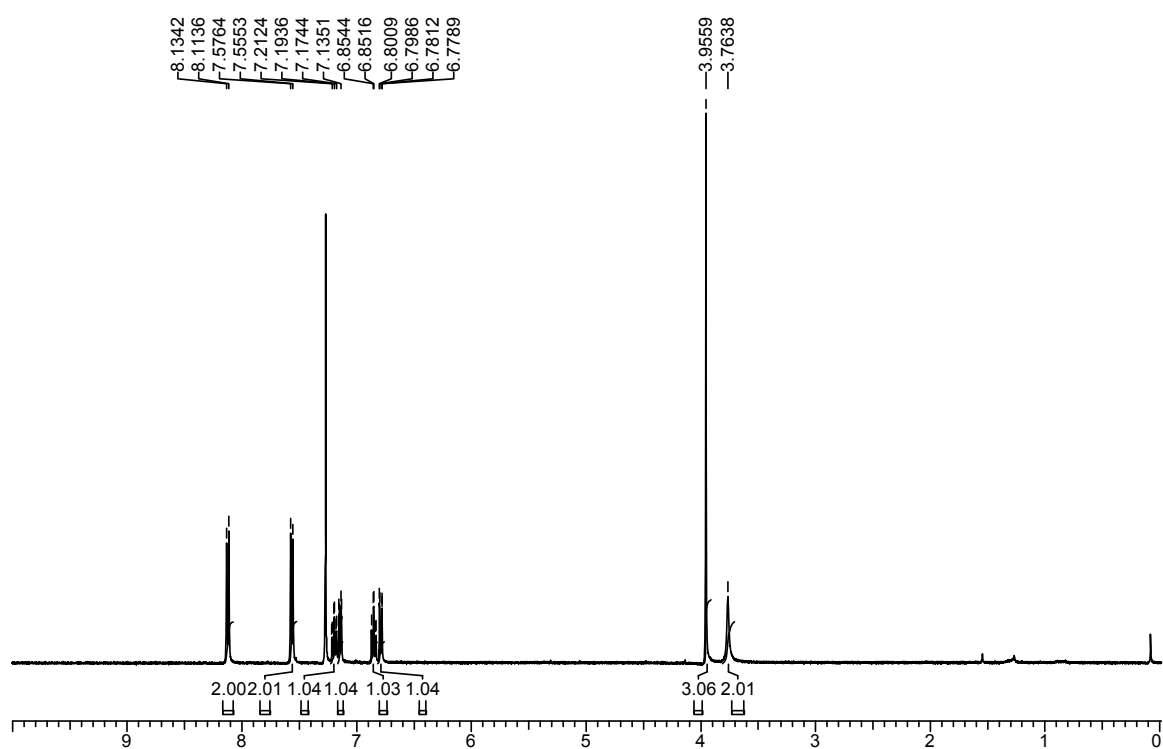

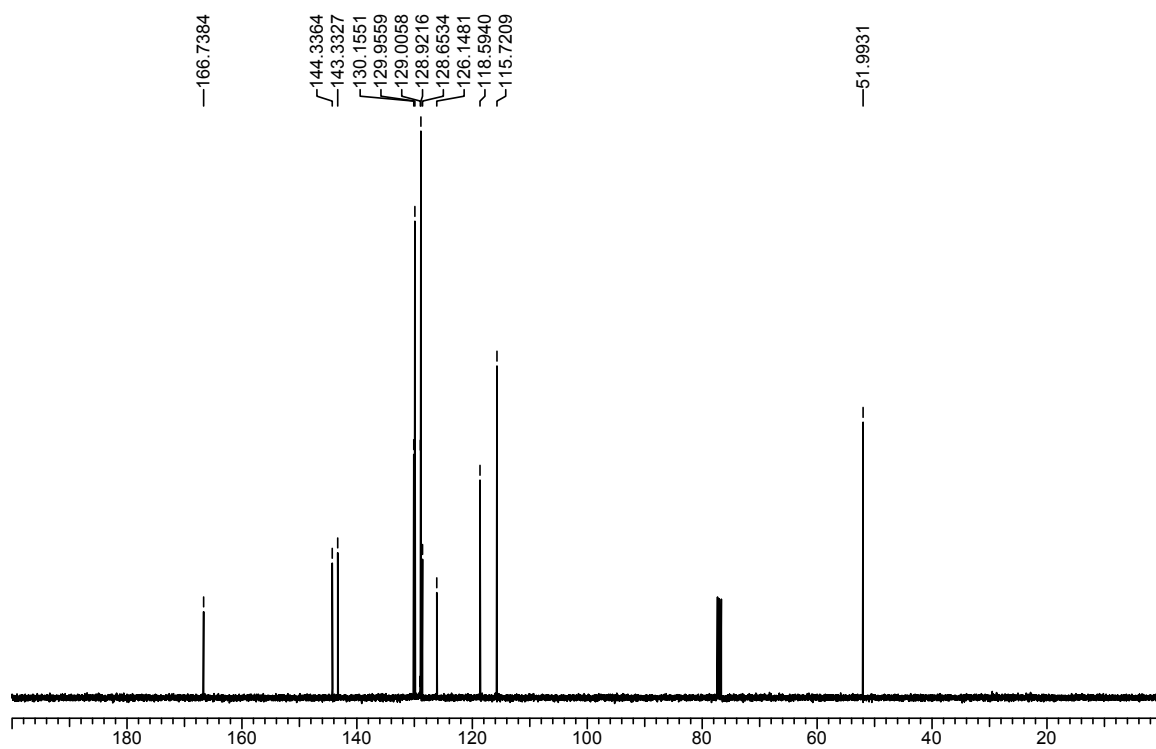



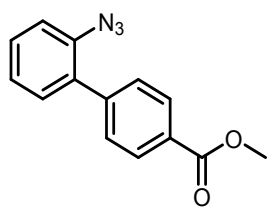

**S8**

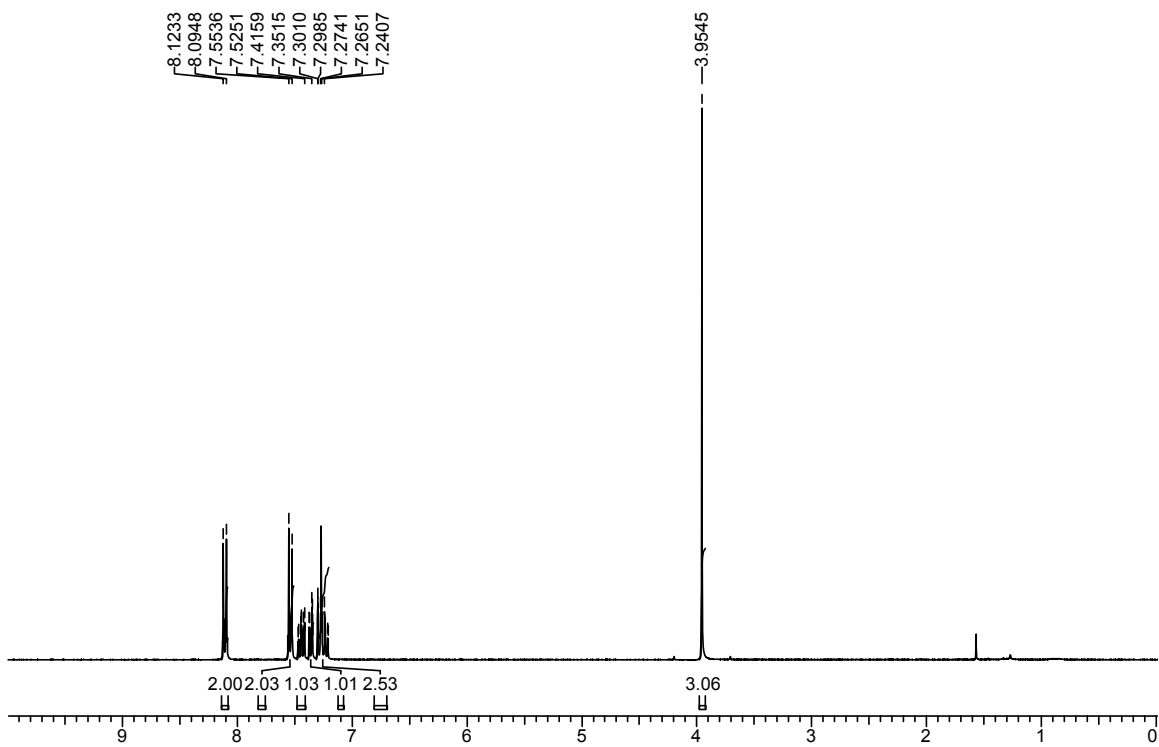

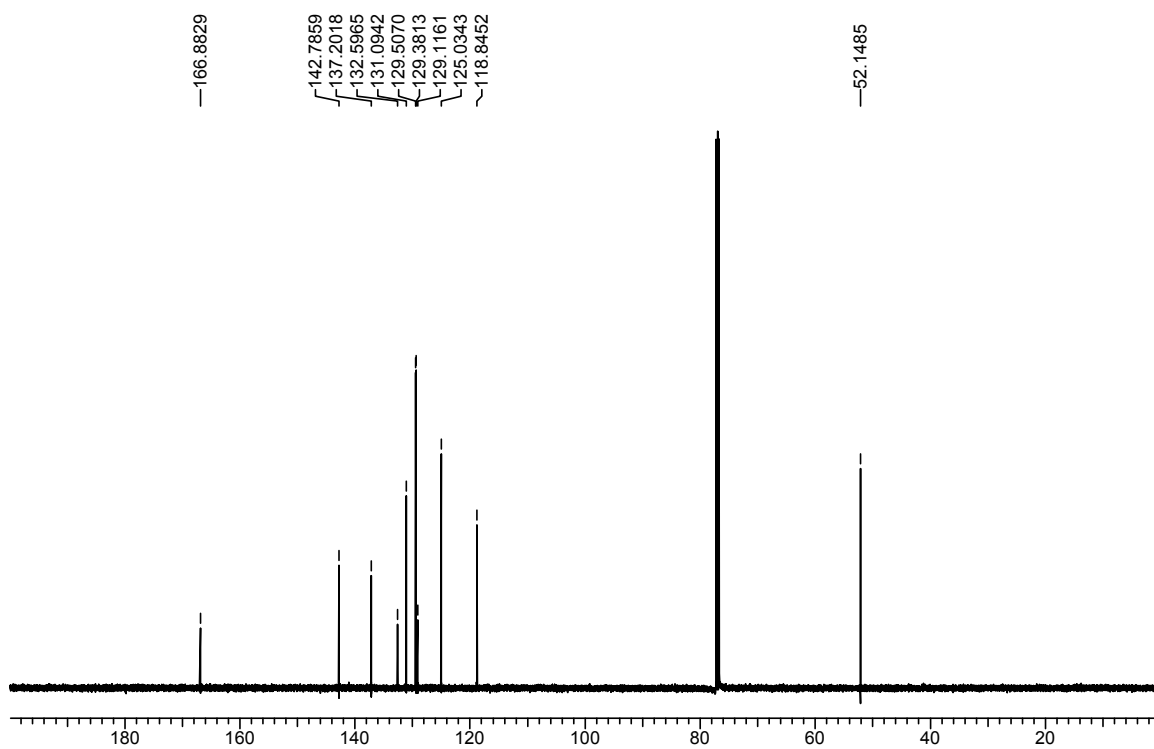

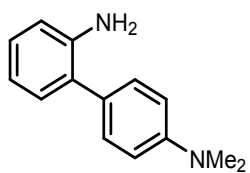

**S11**

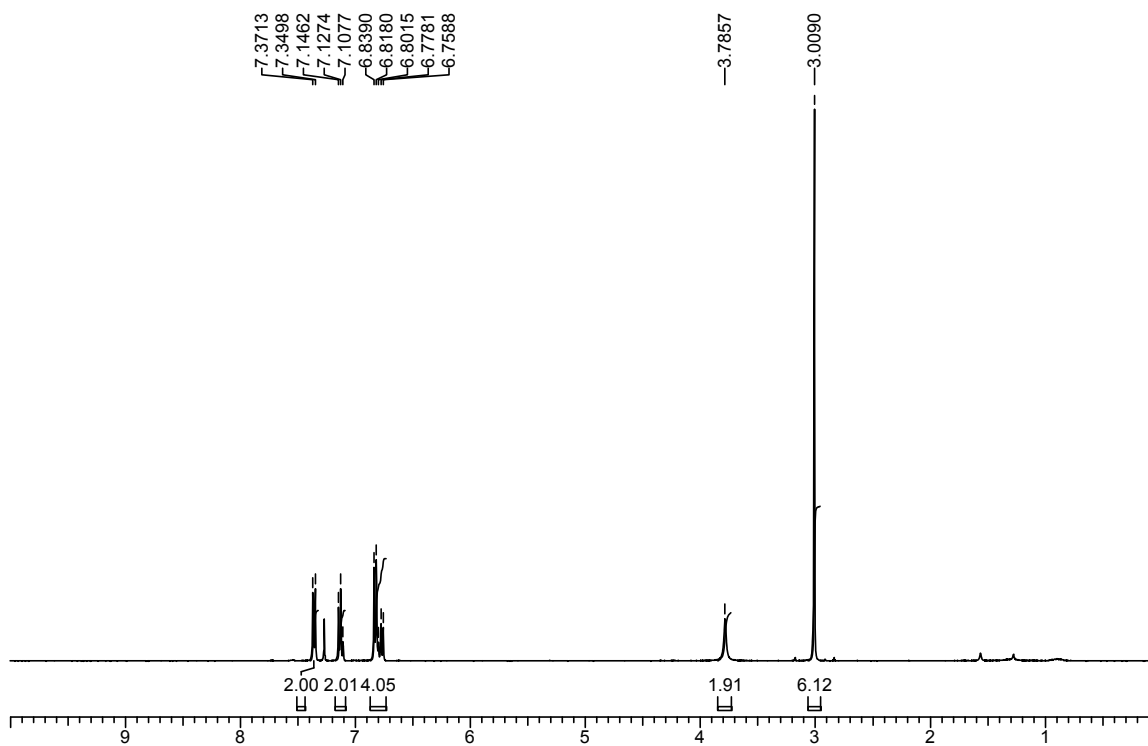

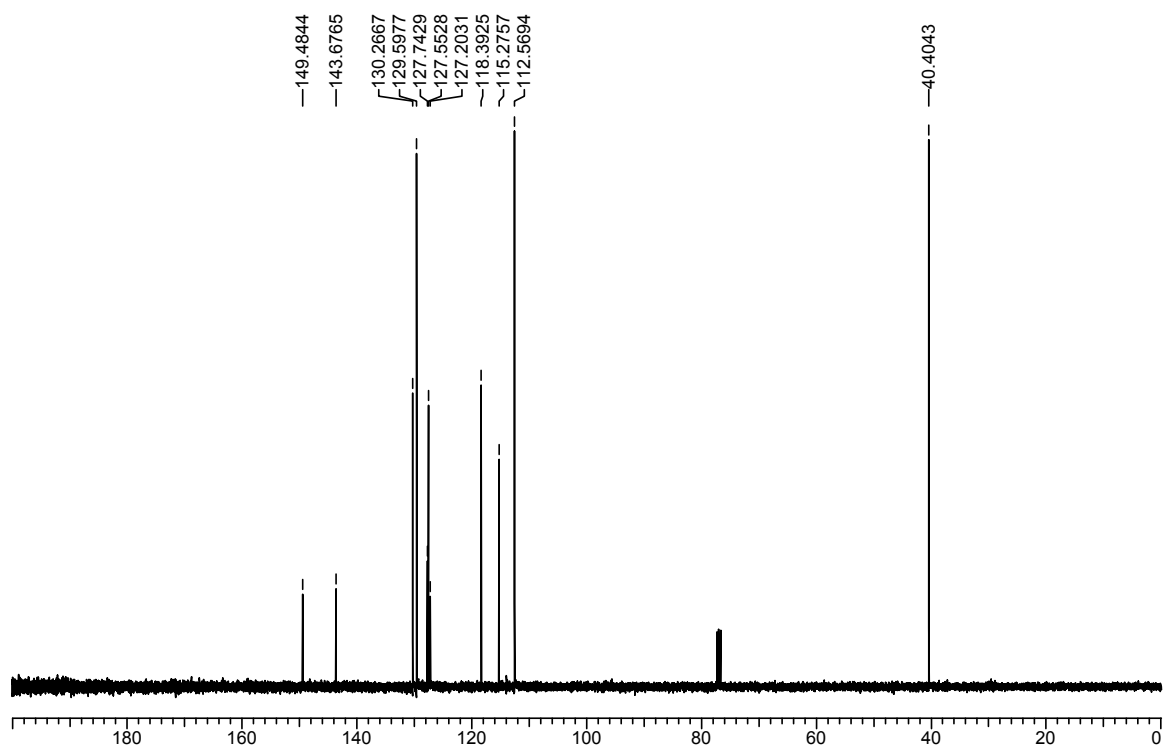

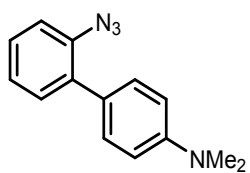

**S12**

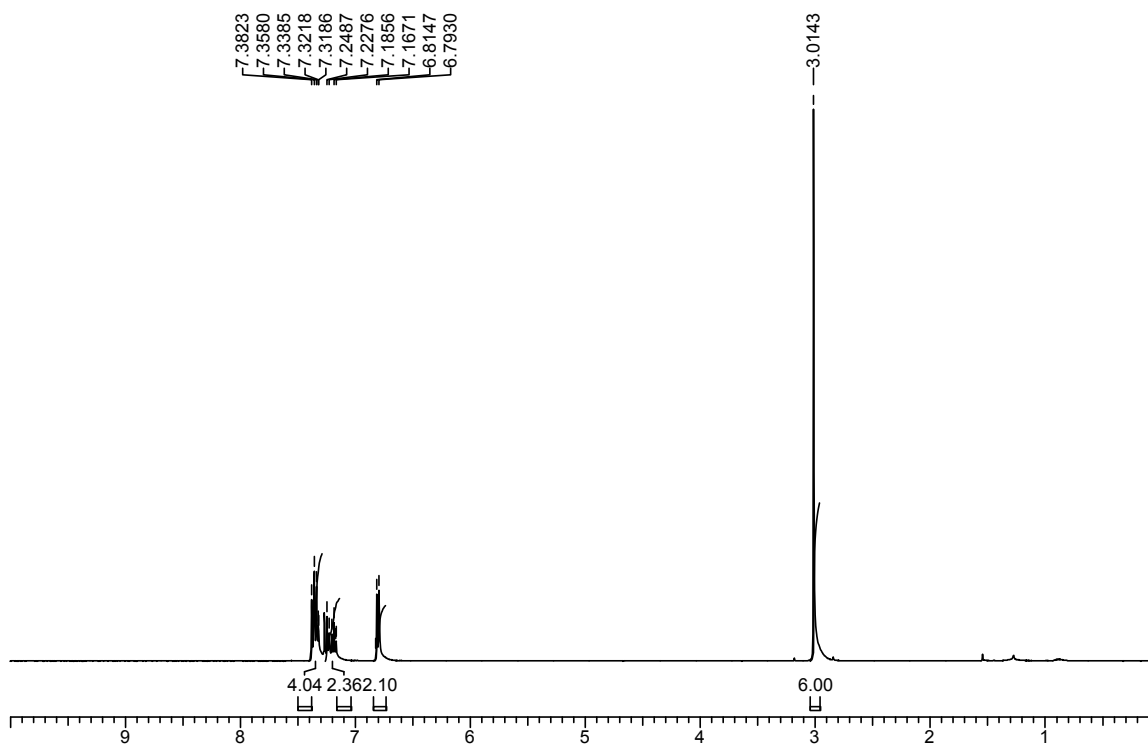

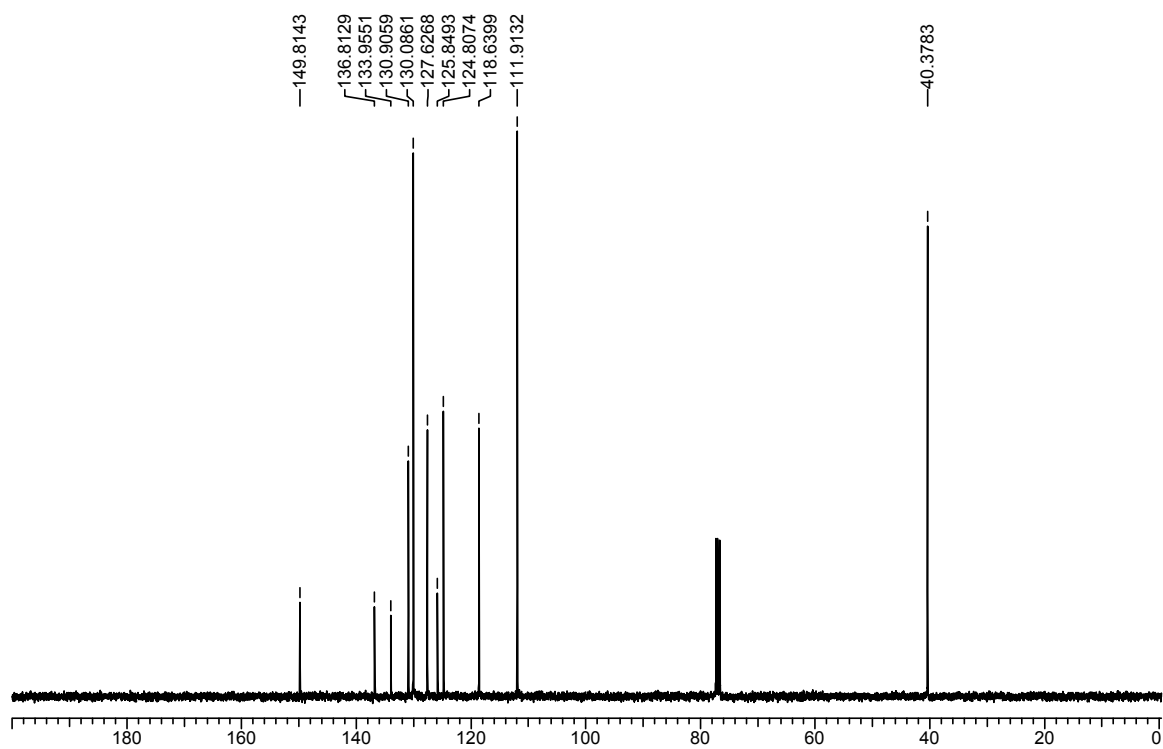

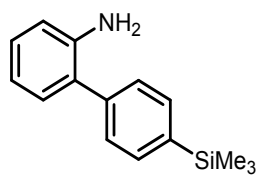

**S15**

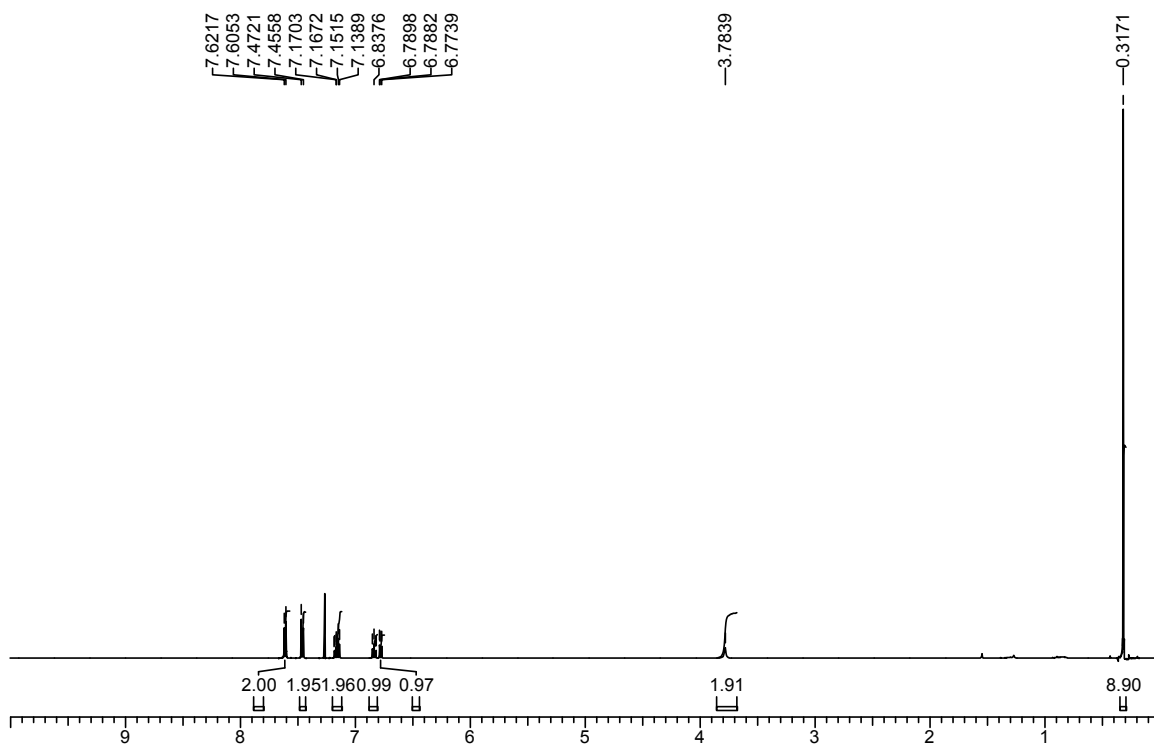

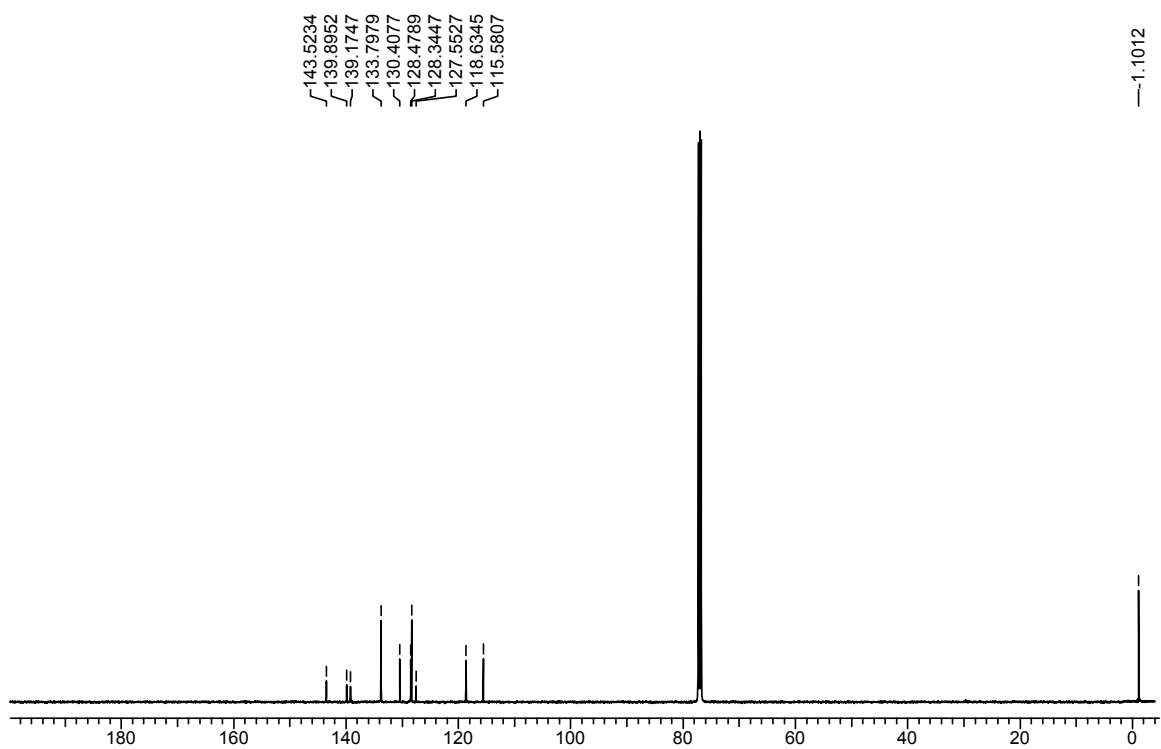



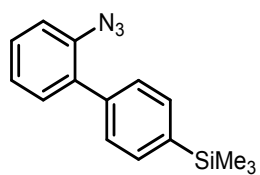

**S16**

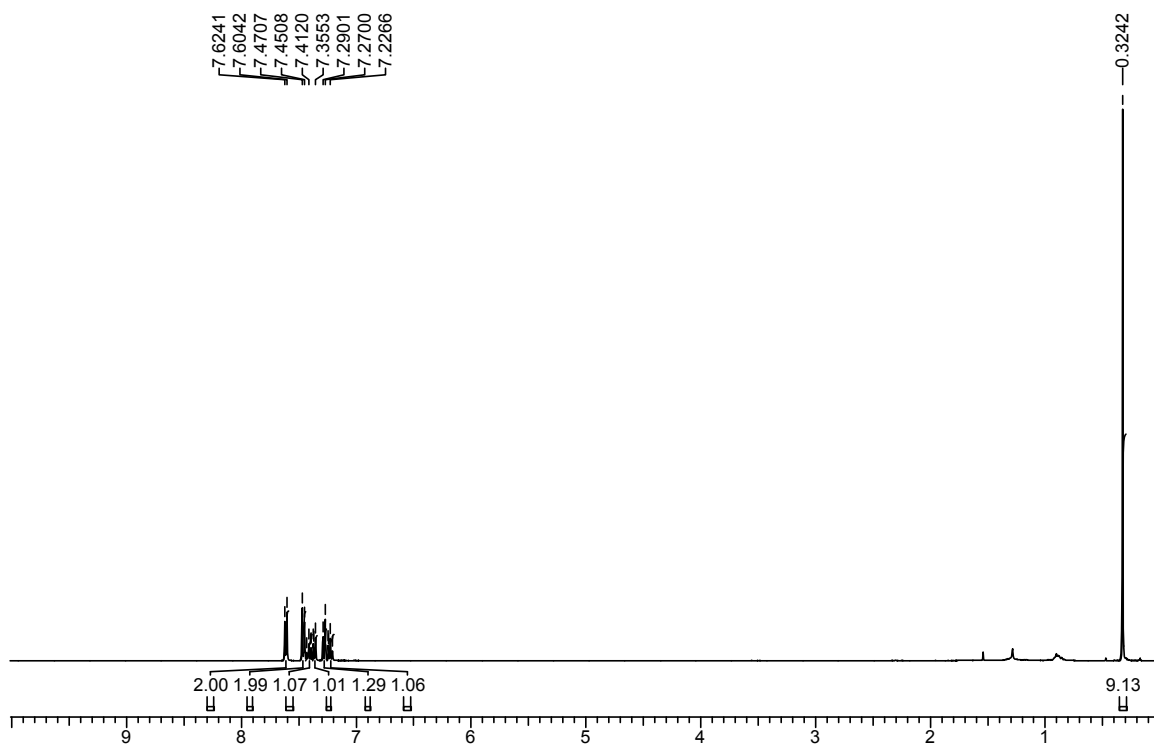

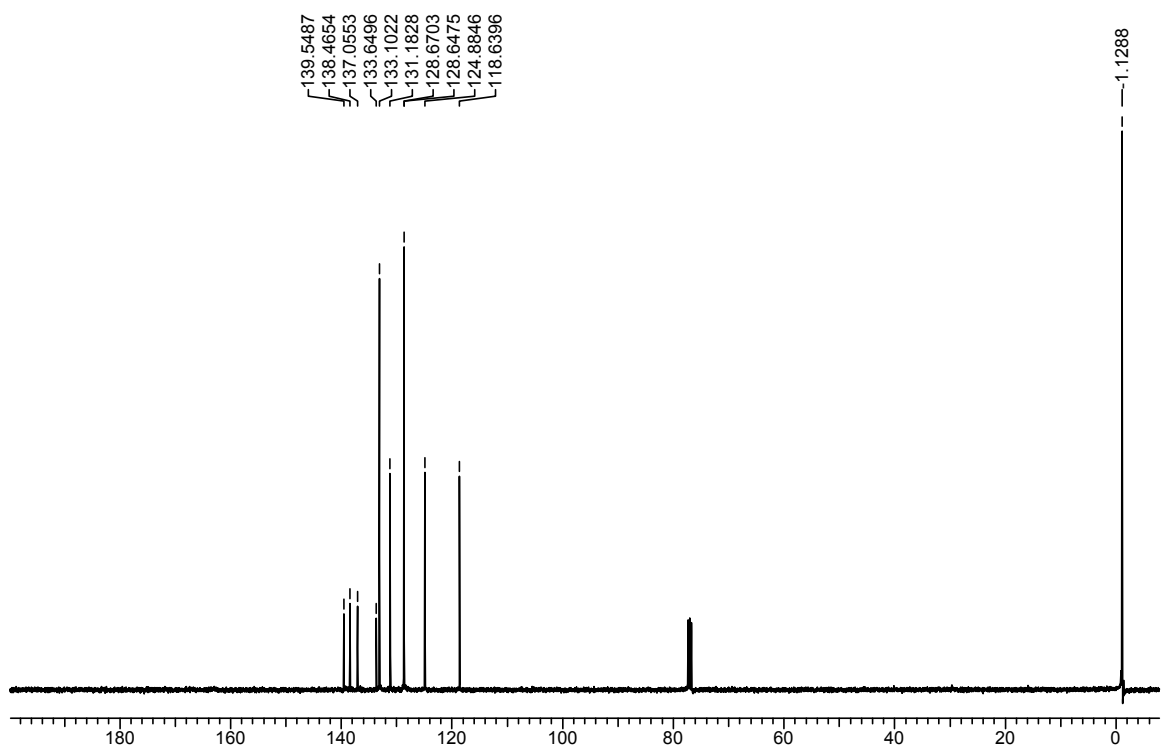

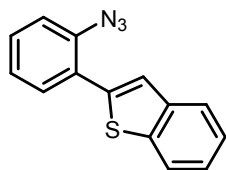

**S28**

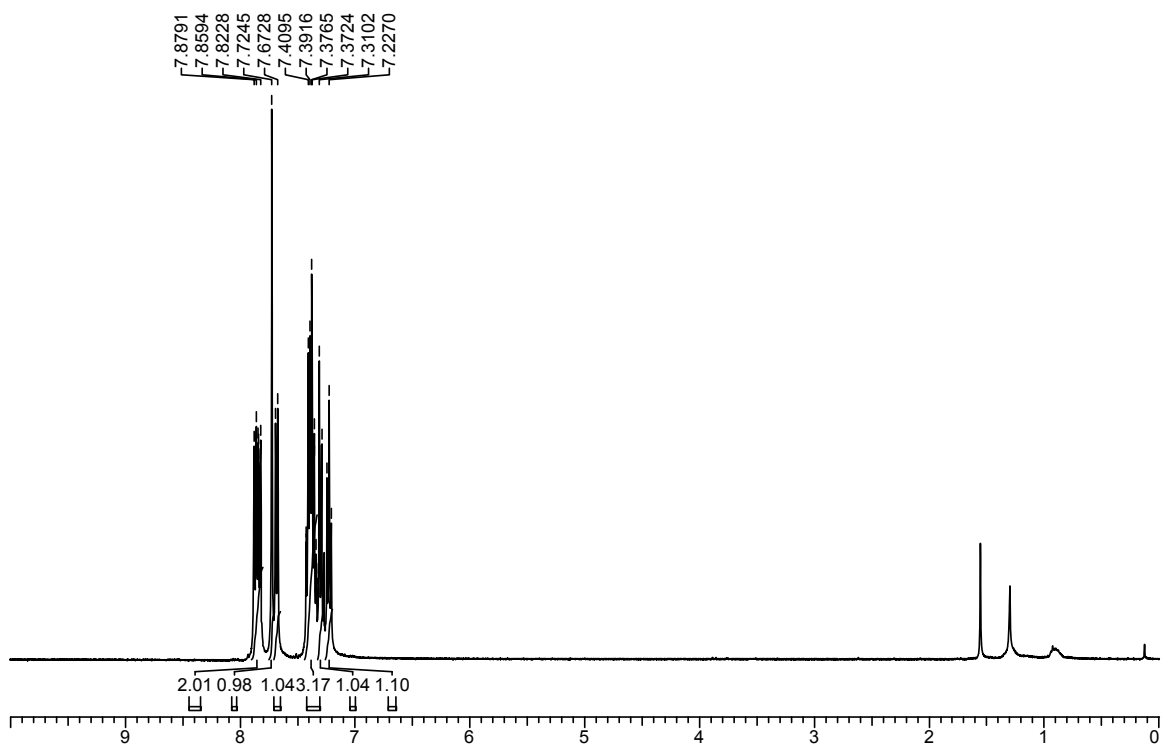

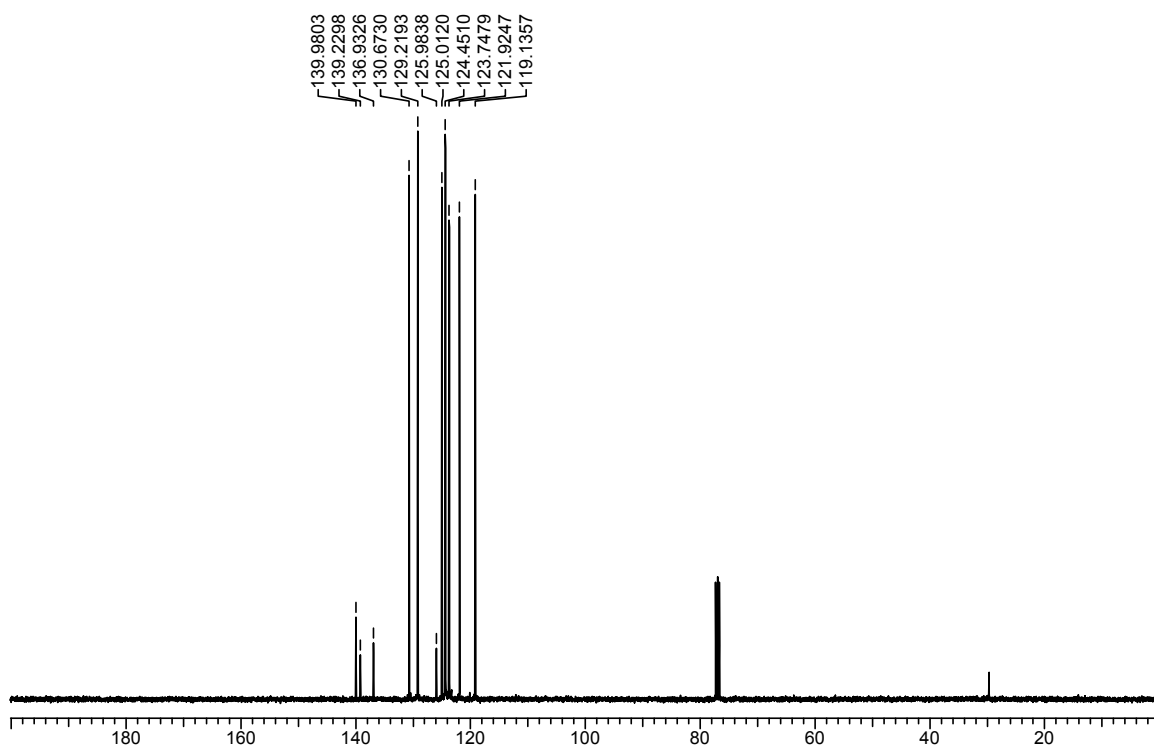

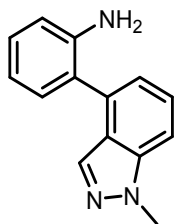

S31

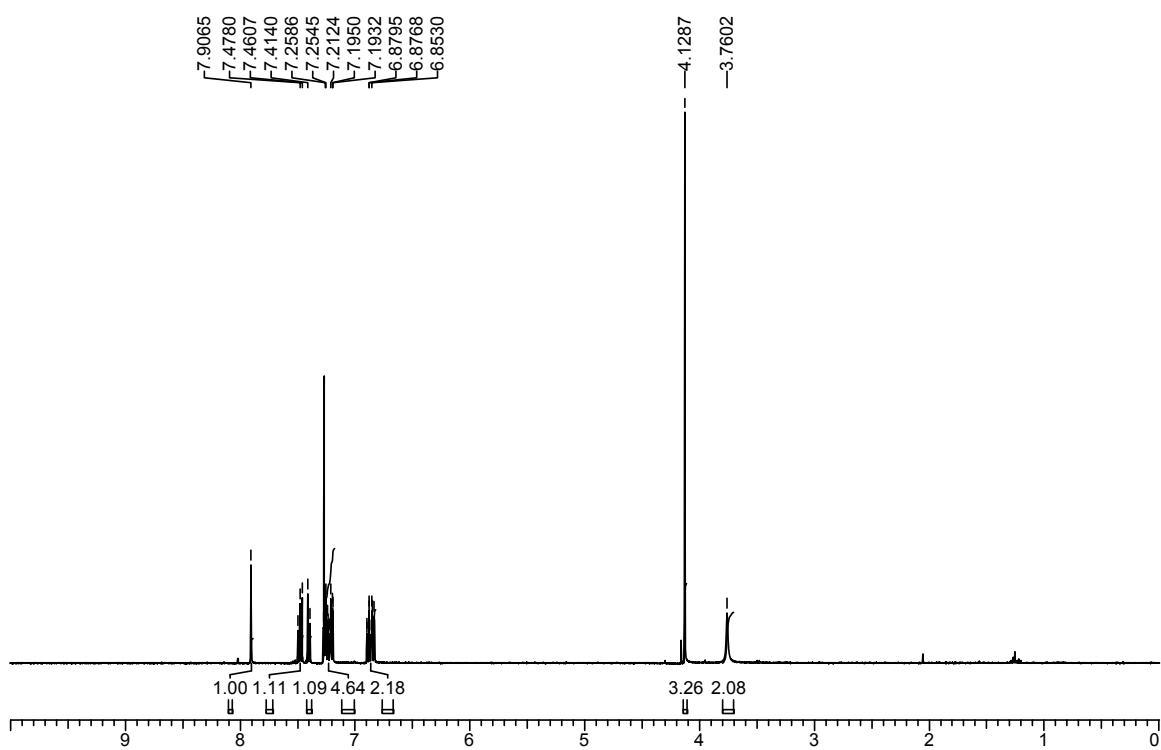

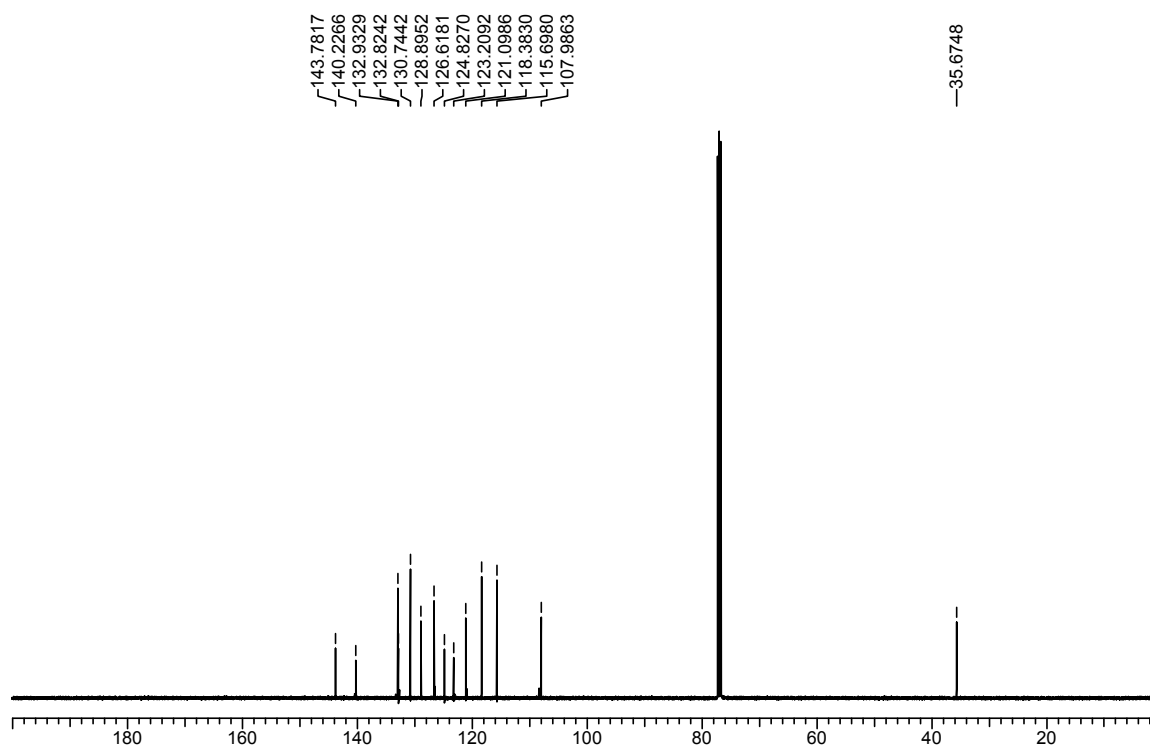

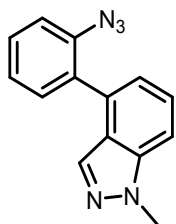

S32

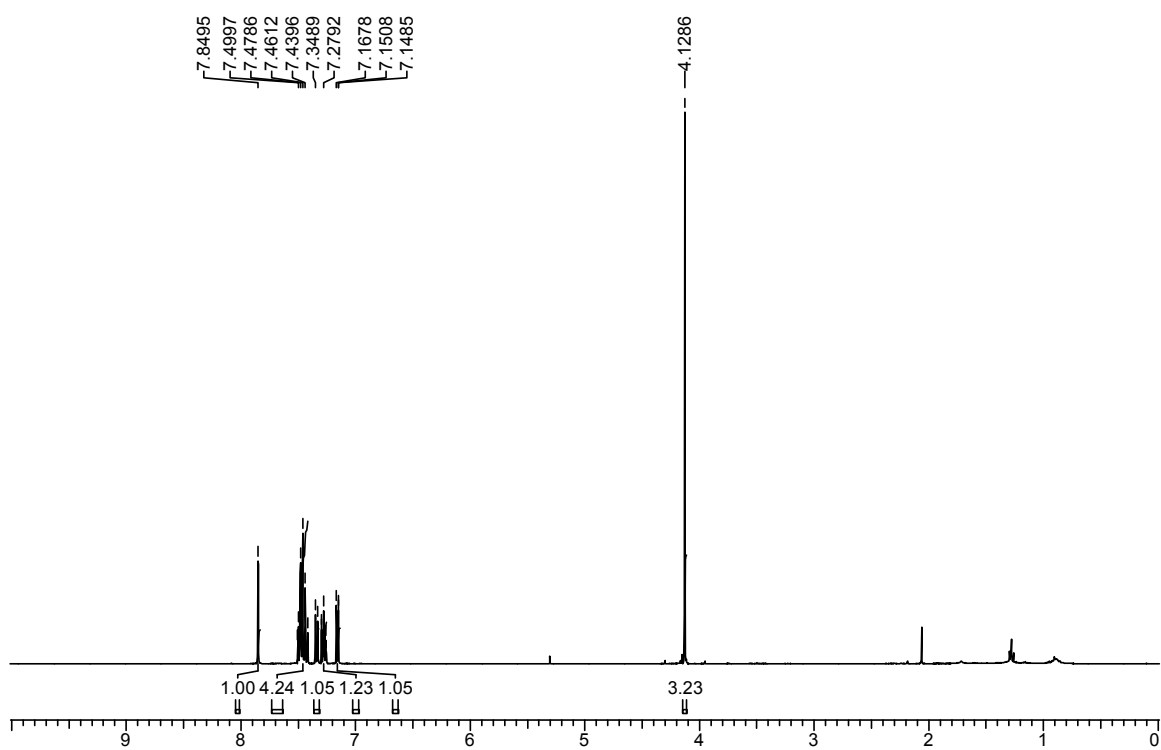

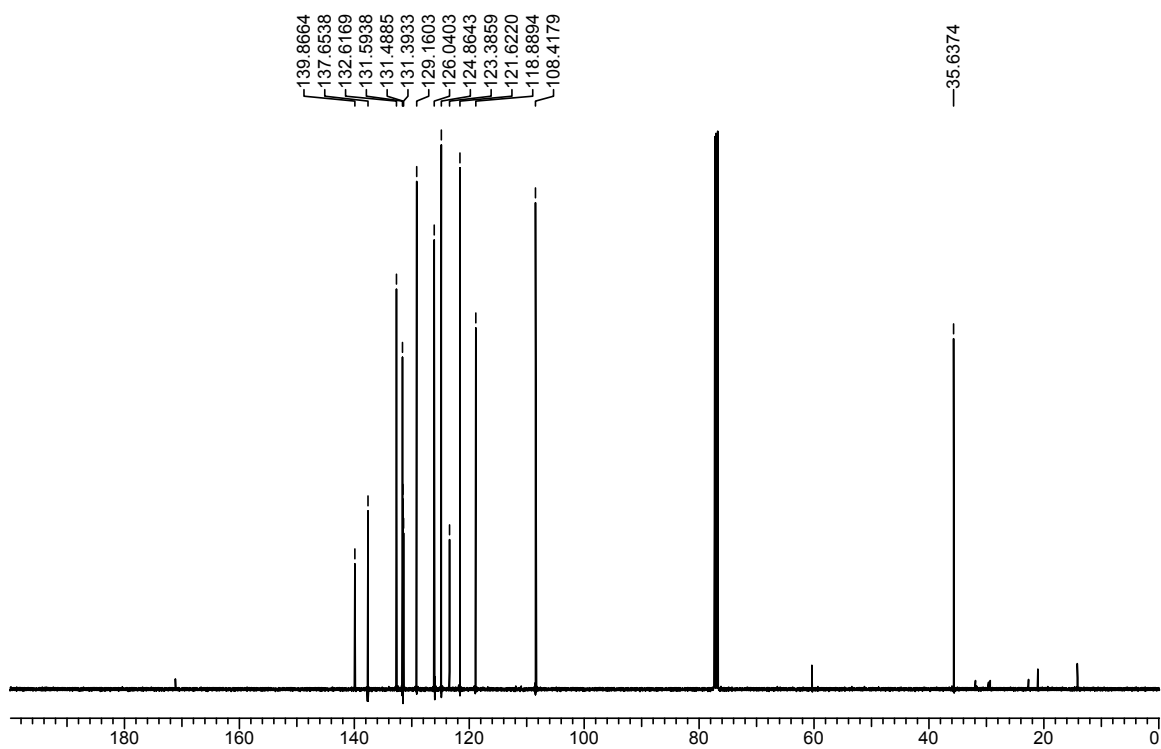



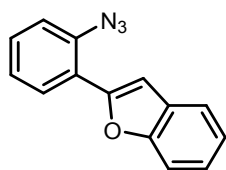

**S34**

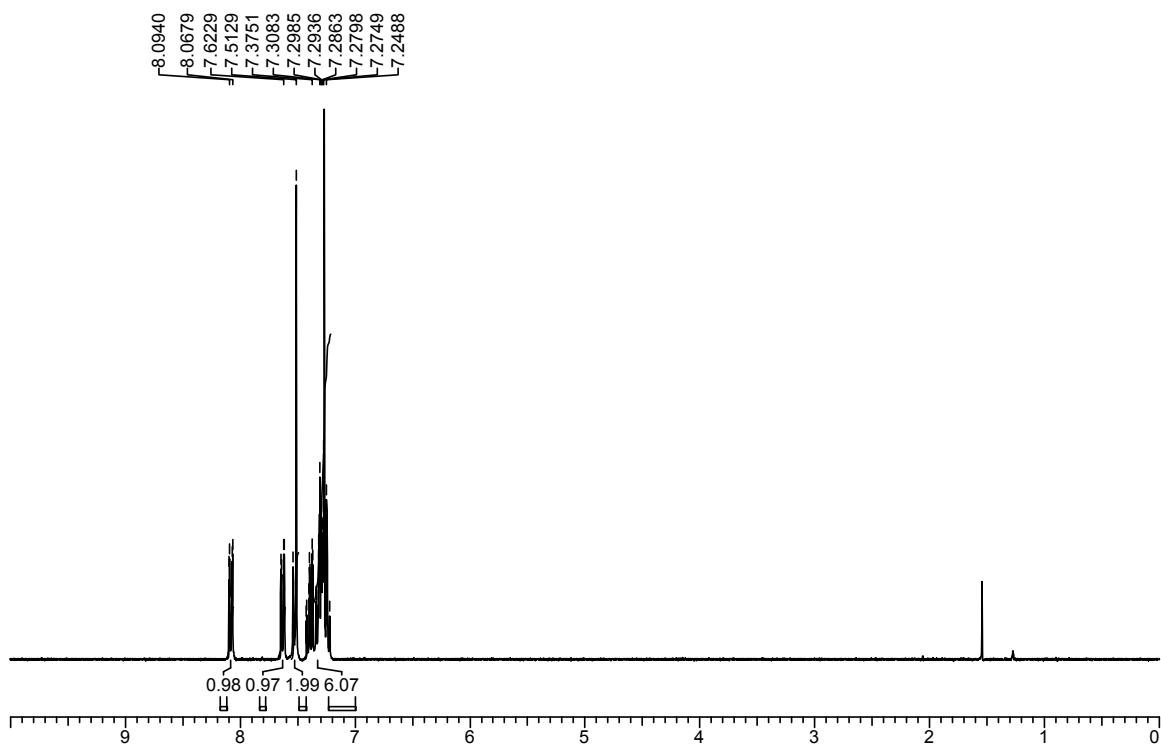

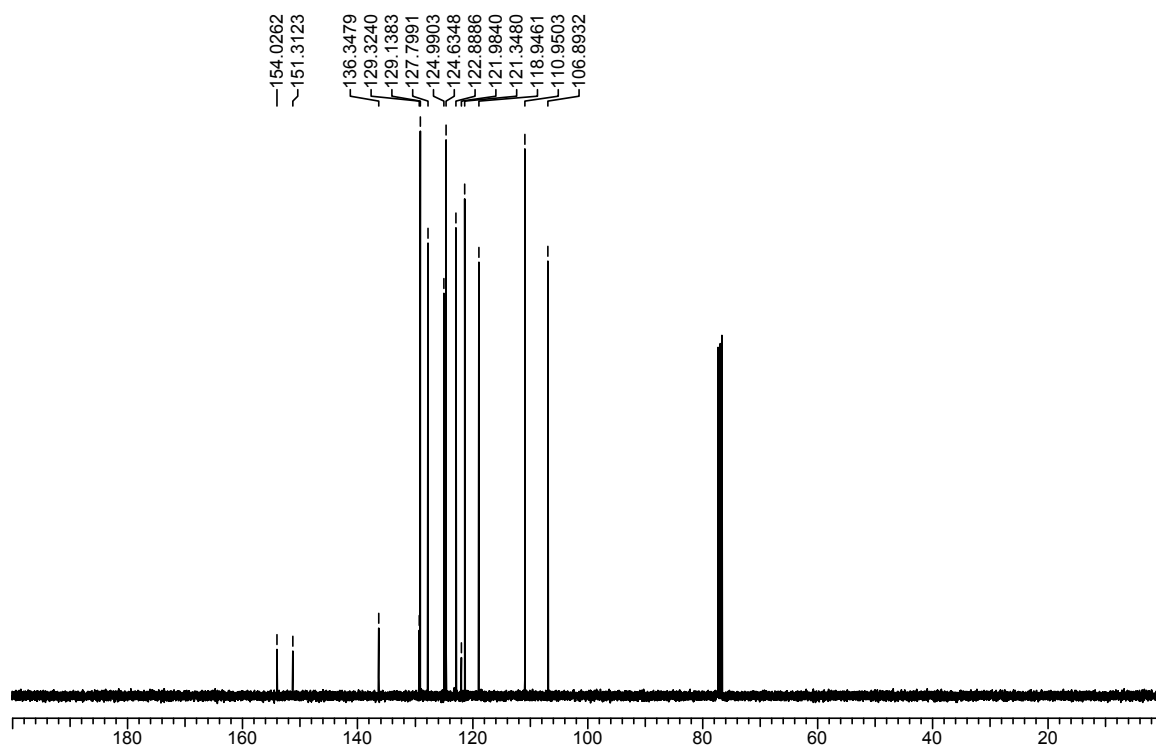

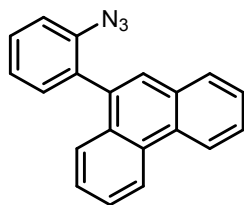

**S38**

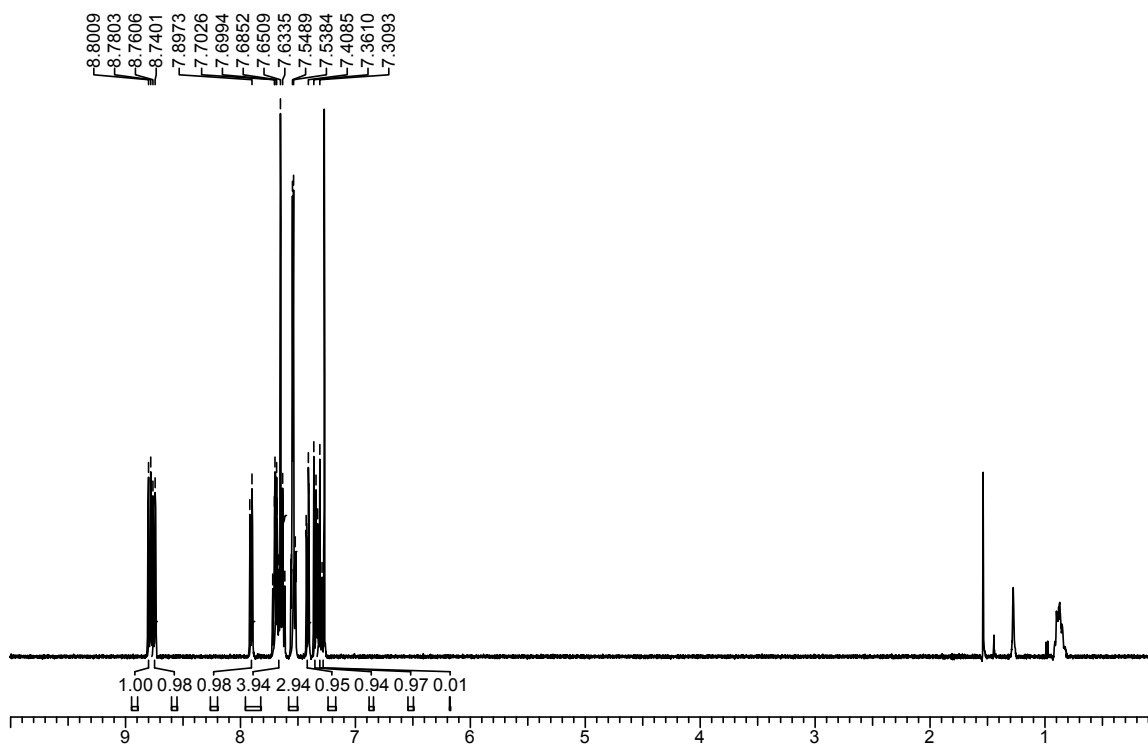

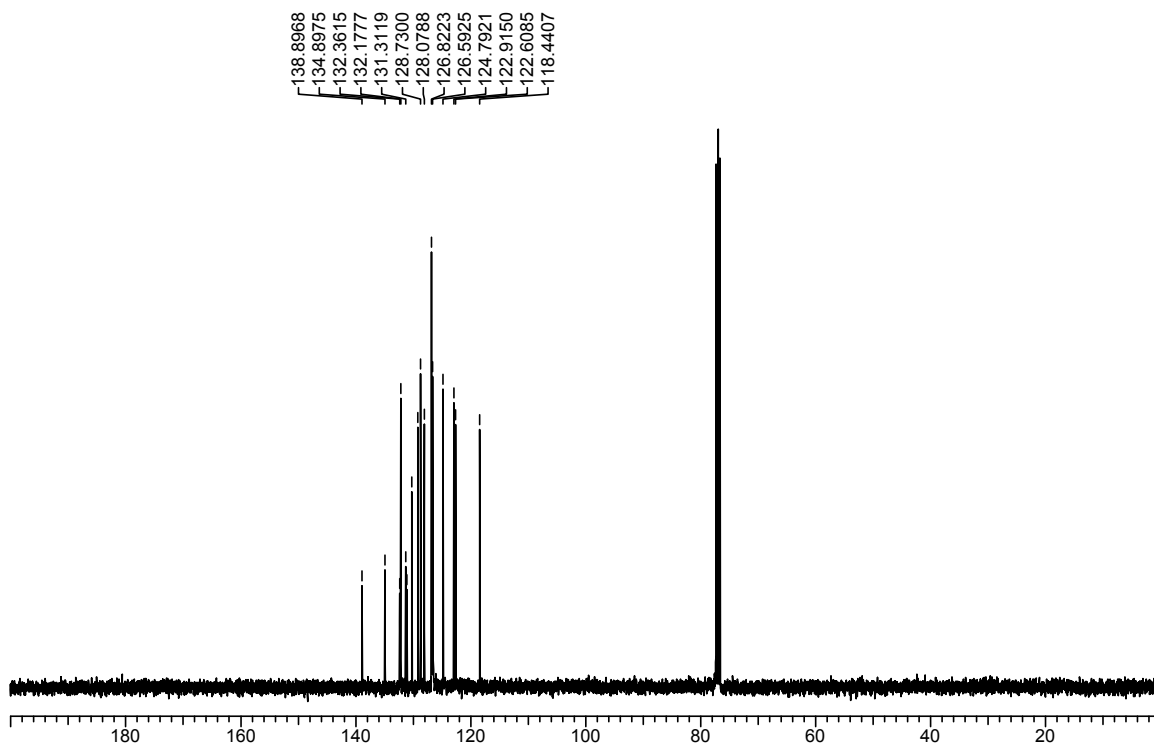

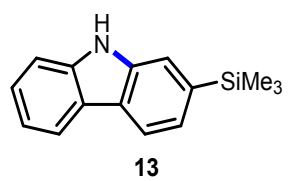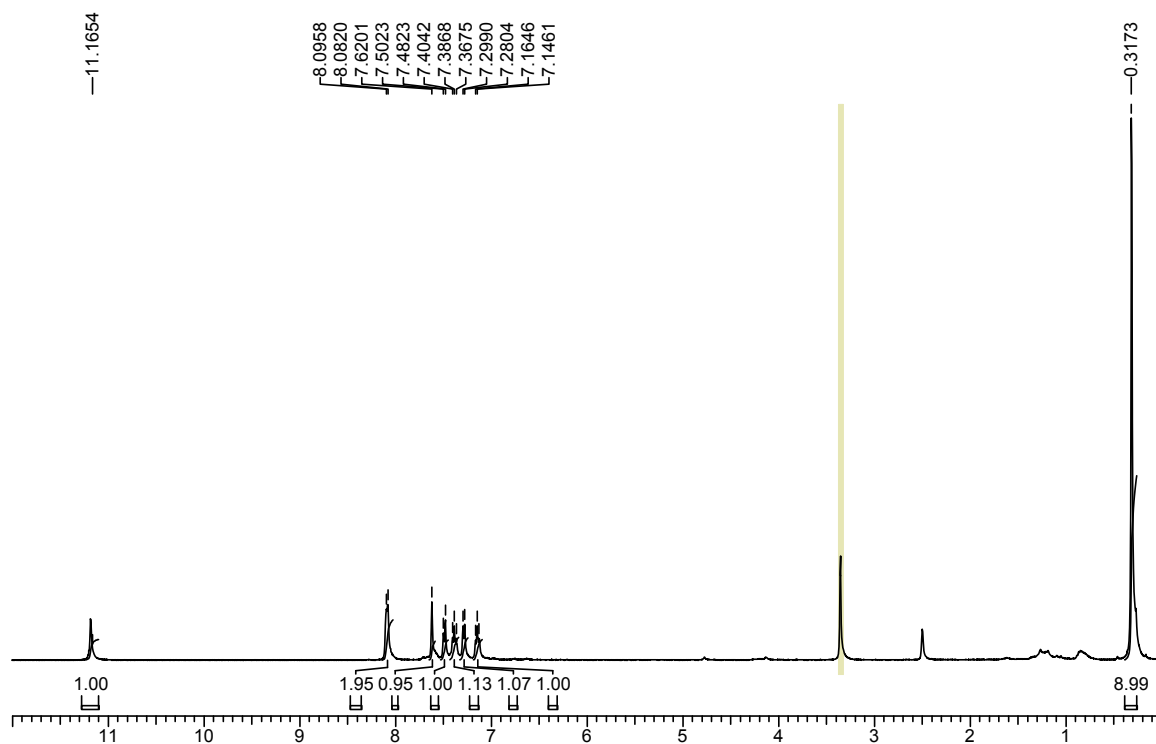

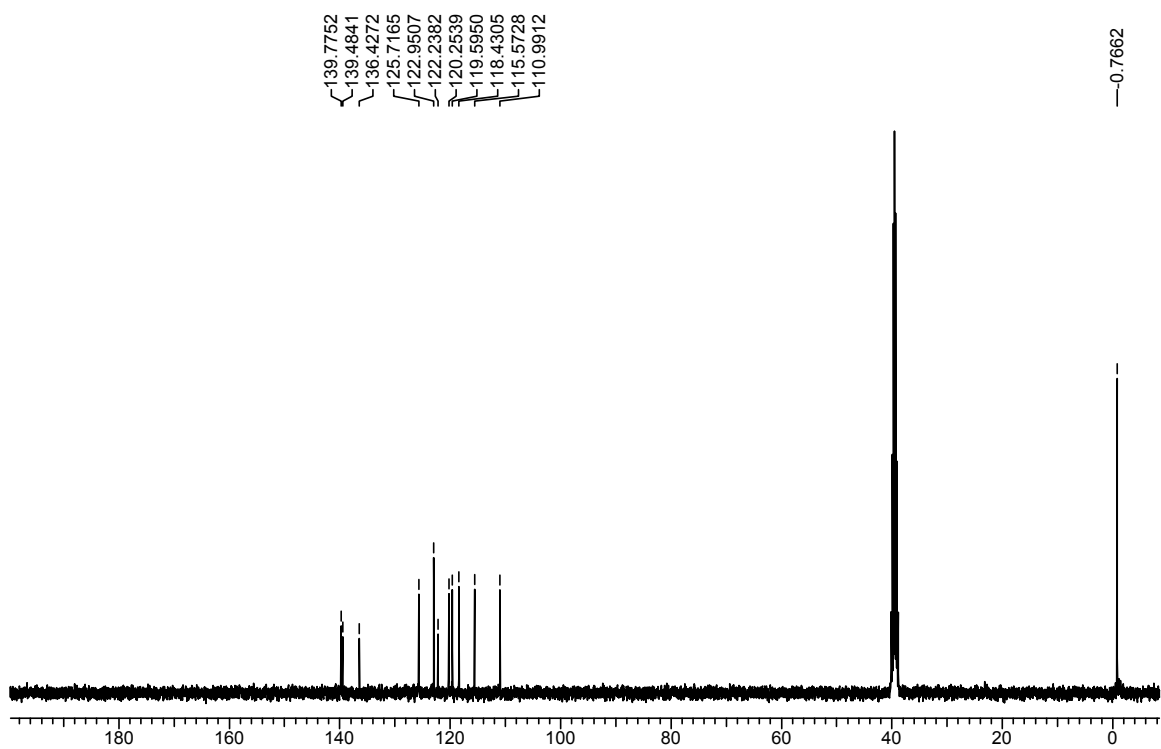

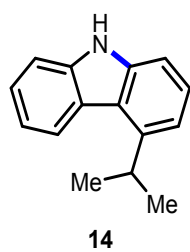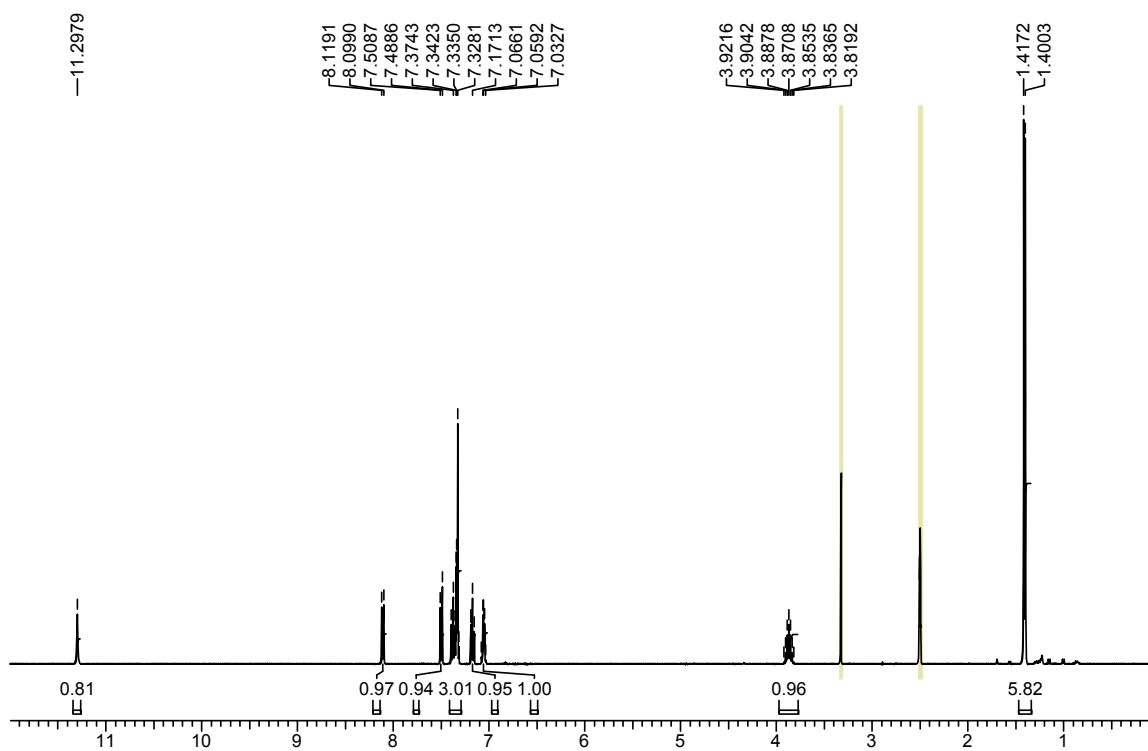

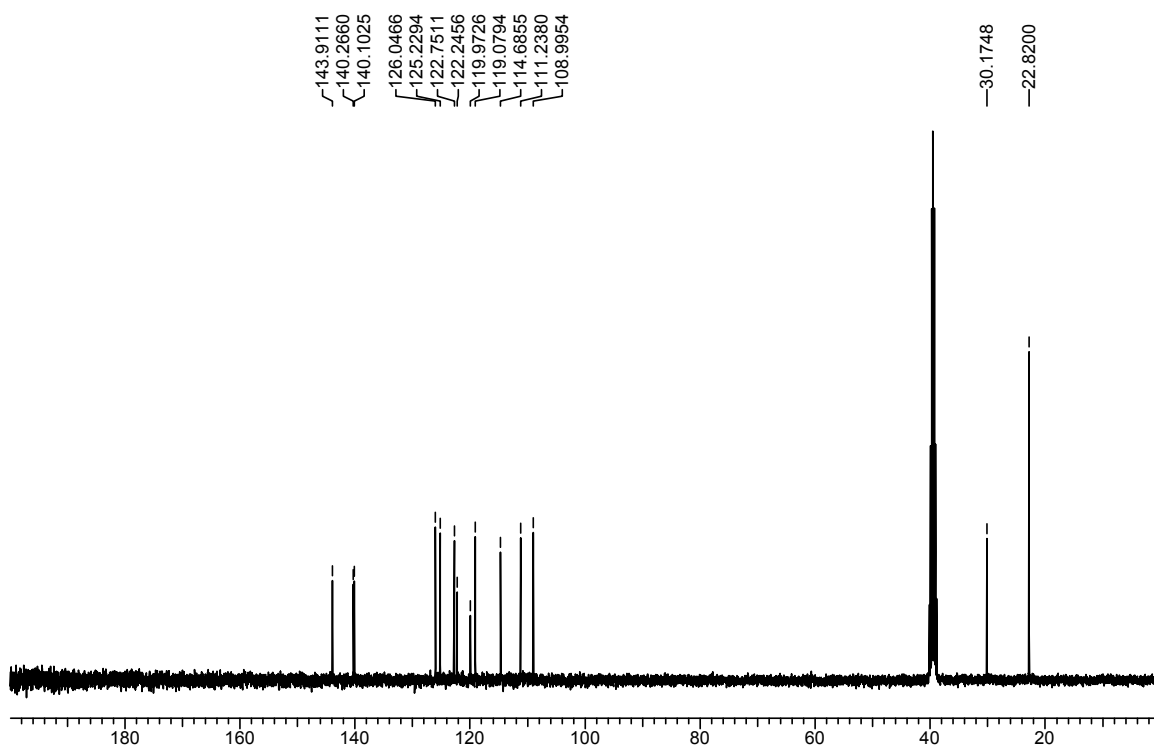



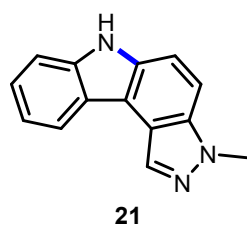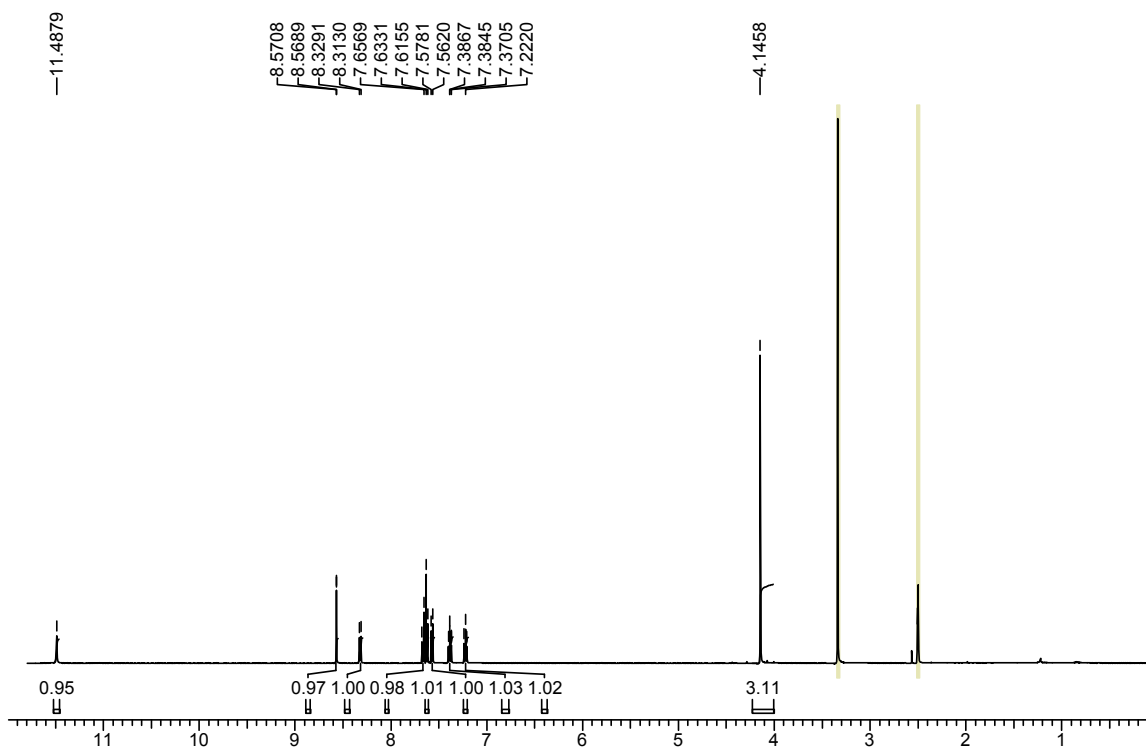

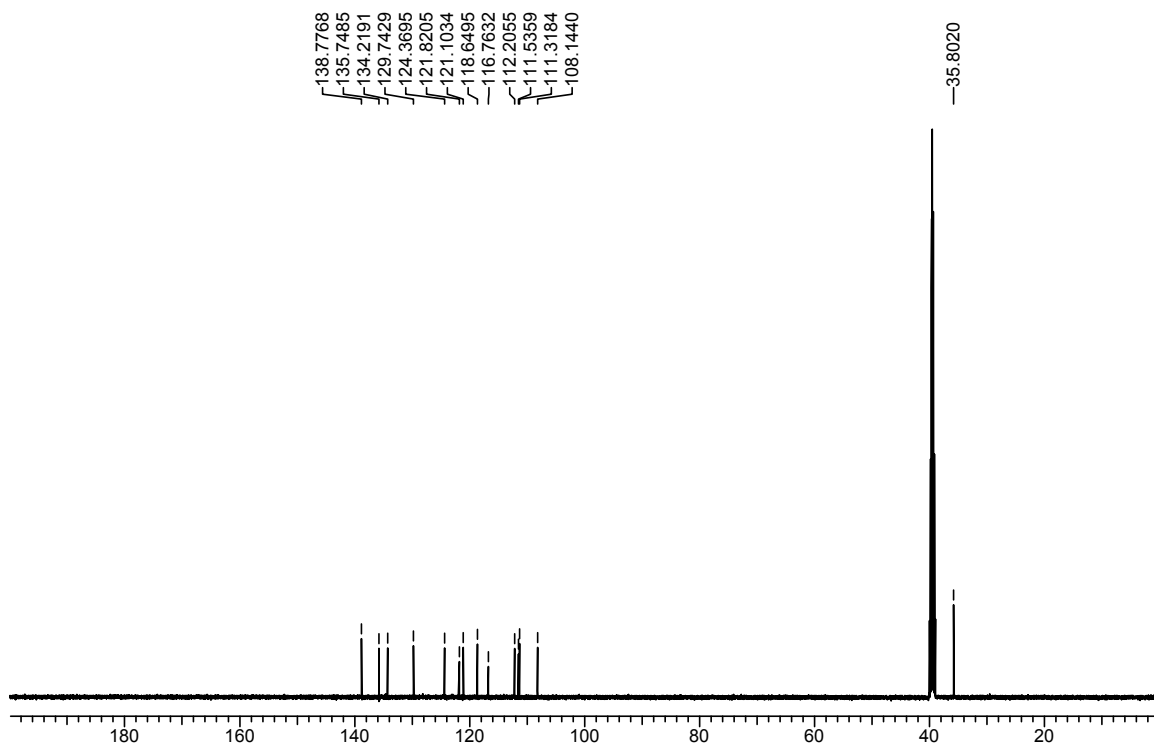

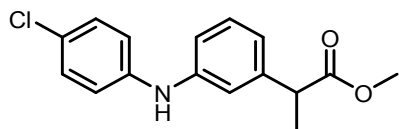

**27**

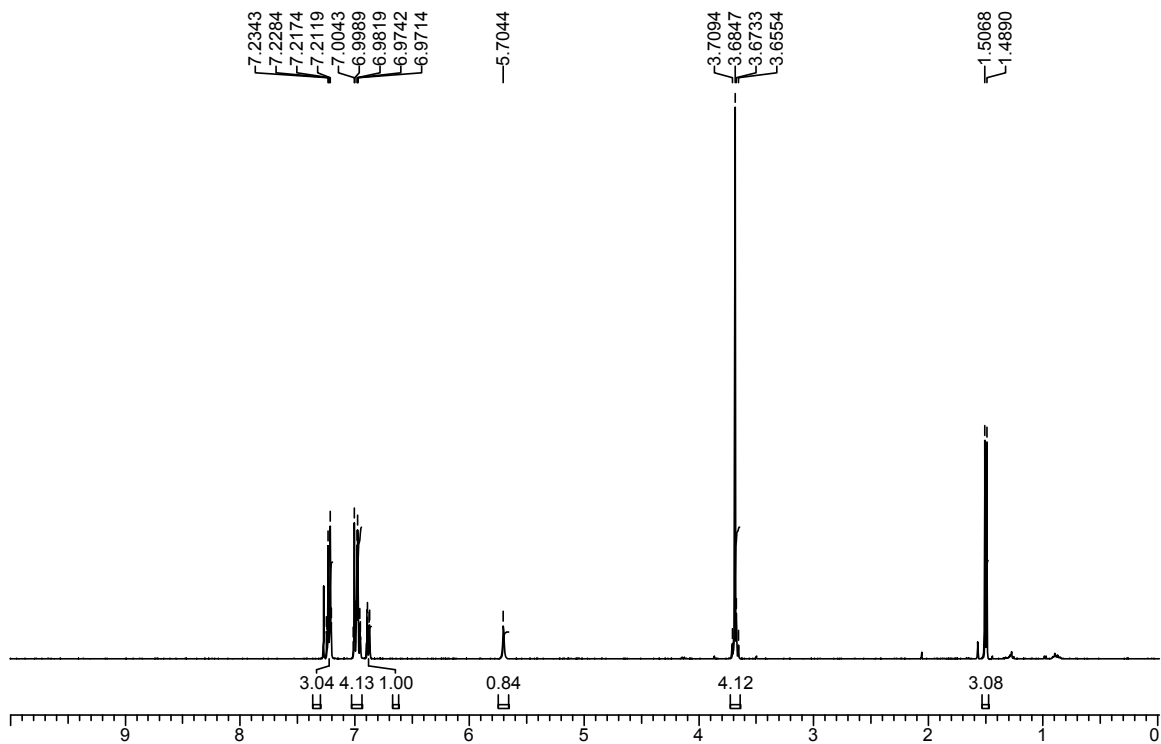

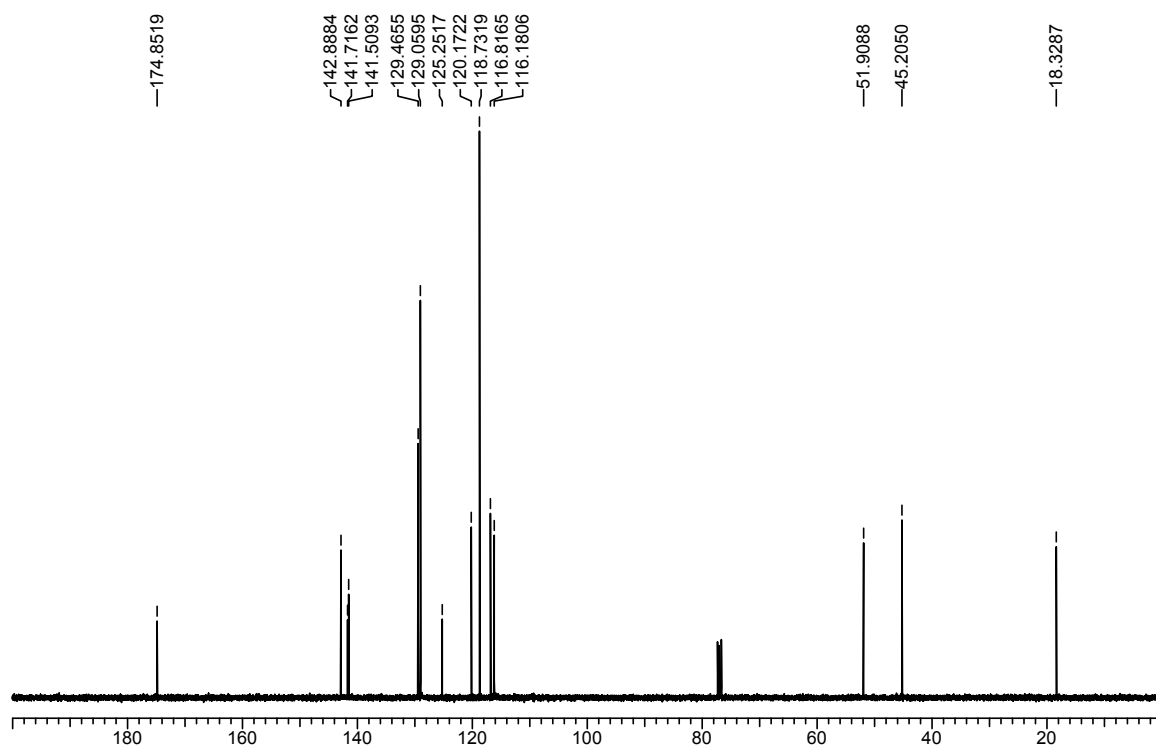

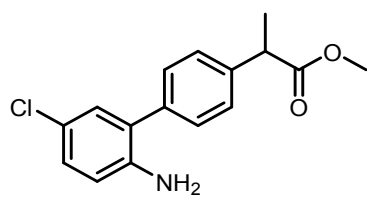

**S46**

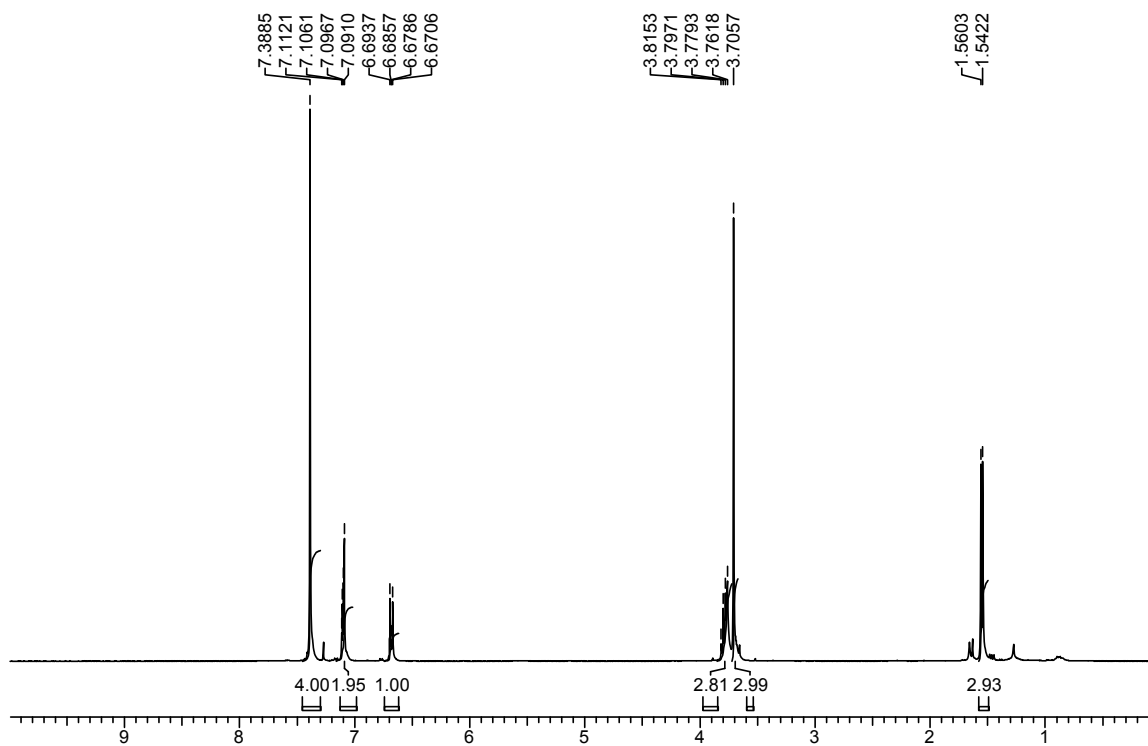

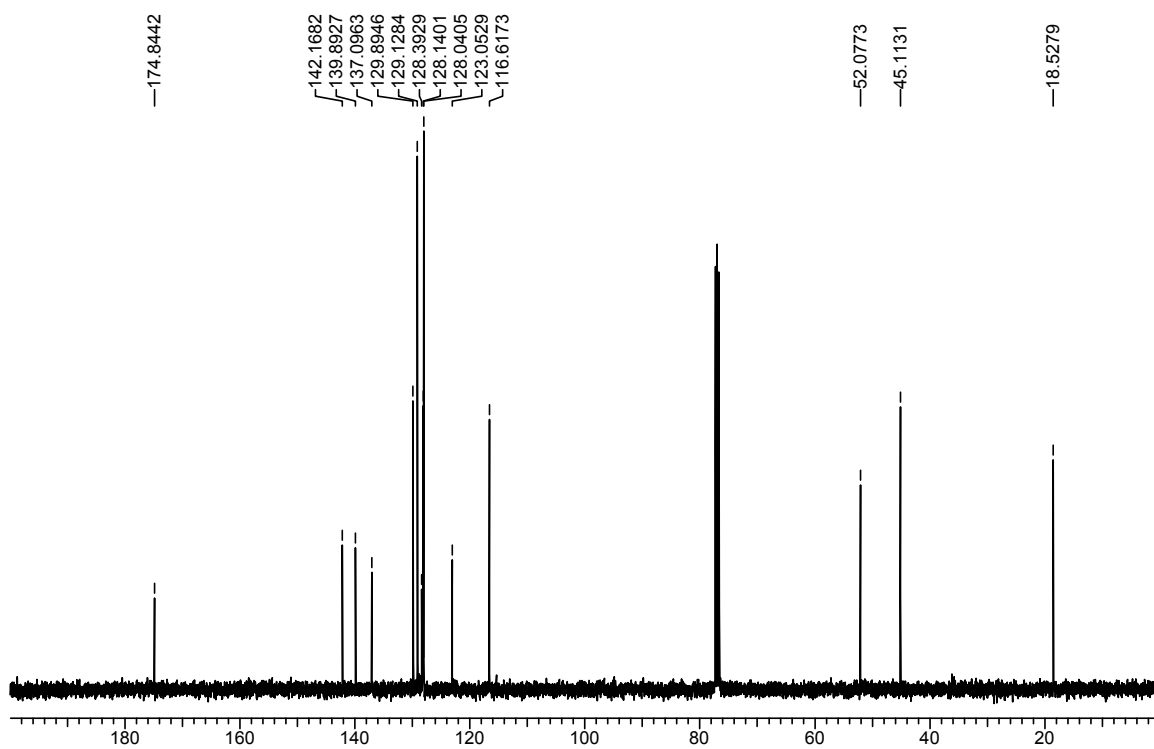

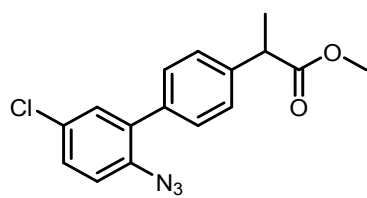

28

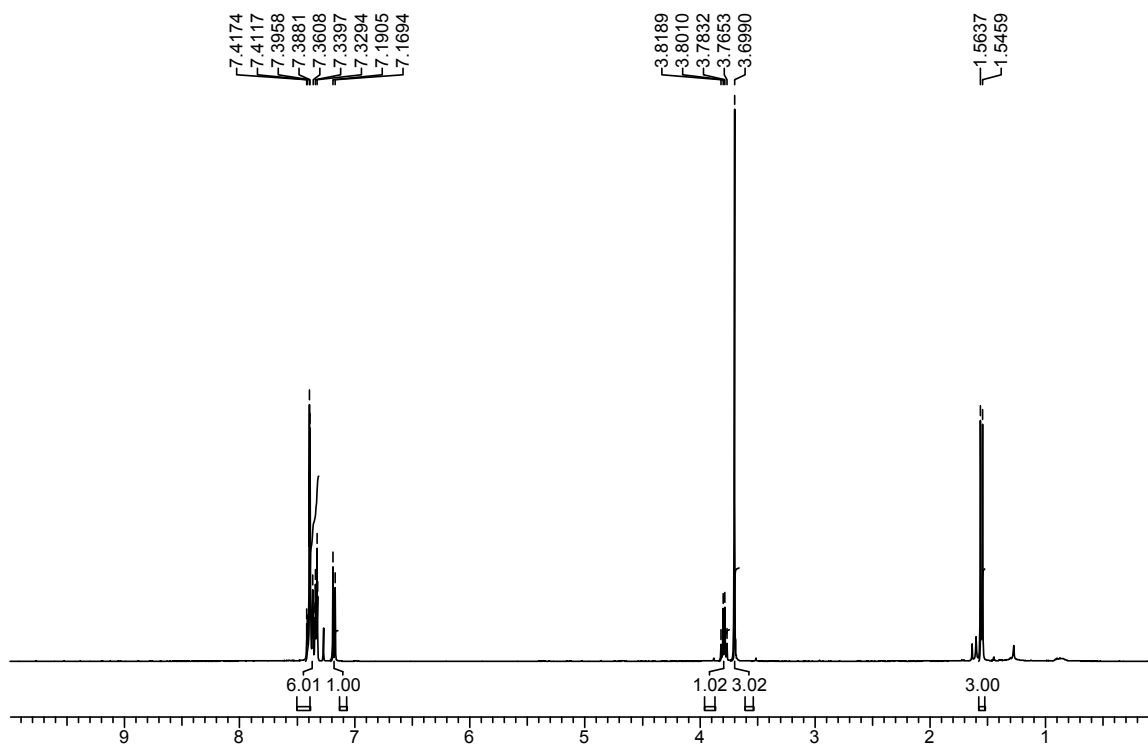

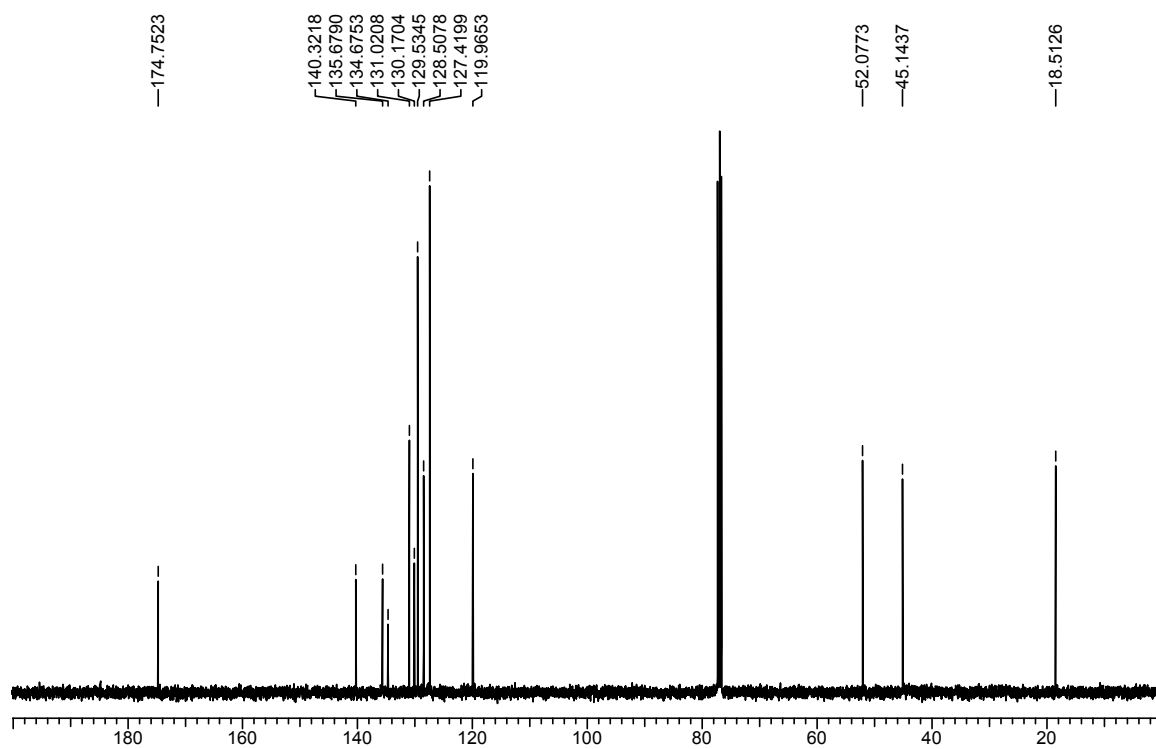

Supplement: c7gc02261a1.pdf [file c7gc02261a1.pdf]
